# Supplementary material
Source: PubMed Central journal article supplement (PMC11225596)
Supplement: NIHMS2002375-supplement-Appendix.pdf [file NIHMS2002375-supplement-Appendix.pdf]

## Supplementary Appendix

Supplement to: Gounder M, Ratan R, Alcindor T, et al. Nirogacestat, a  $\gamma$ -secretase inhibitor for desmoid tumors. N Engl J Med 2023;388:898-912. DOI: 10.1056/NEJMoa2210140

This appendix has been provided by the authors to give readers additional information about the work.

(PDF updated October 12, 2023)

# Supplementary Materials

## Nirogacestat, a $\gamma$ -Secretase Inhibitor for Desmoid Tumors

Mrinal Gounder, MD;<sup>1\*</sup> Ravin Ratan, MD, M.Ed;<sup>2\*</sup> Thierry Alcindor, MD, MSc;<sup>3</sup> Patrick Schöffski, MD, MPH;<sup>4</sup> Winette T. van der Graaf, MD, PhD;<sup>5</sup> Breelyn A. Wilky, MD;<sup>6</sup> Richard F. Riedel, MD;<sup>7</sup> Allison Lim, PharmD;<sup>8</sup> L. Mary Smith, PhD;<sup>8</sup> Stephanie Moody, MS;<sup>9</sup> Steven Attia, DO;<sup>10</sup> Sant Chawla, MD, FRACP;<sup>11</sup> Gina D' Amato, MD;<sup>12</sup> Noah Federman, MD;<sup>13</sup> Priscilla Merriam, MD;<sup>14</sup> Brian A. Van Tine, MD, PhD;<sup>15</sup> Bruno Vincenzi, MD, PhD;<sup>16</sup> Charlotte Benson, MBChB;<sup>17</sup> Nam Quoc Bui, MD;<sup>18</sup> Rashmi Chugh, MD;<sup>19</sup> Gabriel Tinoco, MD;<sup>20</sup> John Charlson, MD;<sup>21</sup> Palma Dileo, MD;<sup>22</sup> Lee Hartner, MD;<sup>23</sup> Lore Lapeire, MD;<sup>24</sup> Filomena Mazzeo, MD;<sup>25</sup> Emanuela Palmerini, MD, PhD;<sup>26</sup> Peter Reichardt, MD;<sup>27</sup> Silvia Stacchiotti, MD;<sup>28</sup> Howard H. Bailey, MD;<sup>29</sup> Melissa A. Burgess, MD;<sup>30</sup> Gregory M. Cote, MD, PhD;<sup>31</sup> Lara Davis, MD;<sup>32</sup> Hari Deshpande, MD;<sup>33</sup> Hans Gelderblom, MD, PhD;<sup>34</sup> Giovanni Grignani, MD;<sup>35</sup> Elizabeth Loggers, MD;<sup>36-38</sup> Tony Philip, MD;<sup>39</sup> Joseph G. Pressey, MD;<sup>40</sup> Shivaani Kummar, MD, FACP;<sup>32\*</sup> Bernd Kasper, MD, PhD<sup>41\*</sup>

<sup>1</sup>Sarcoma Medical Oncology, Department of Medicine, Memorial Sloan Kettering Cancer Center, and Weill Cornell Medical College, New York, NY, USA; <sup>2</sup>Department of Sarcoma Medical Oncology, Division of Cancer Medicine, The University of Texas MD Anderson Cancer Center, Houston, TX, USA; <sup>3</sup>Department of Oncology, McGill University, Montreal, QC, Canada; <sup>4</sup>Department of General Medical Oncology, University Hospitals Leuven, KU Leuven, Leuven, Belgium; <sup>5</sup>Department of Medical Oncology, Netherlands Cancer Institute, Amsterdam, The Netherlands; <sup>6</sup>Department of Medicine, University of Colorado Cancer Center, Aurora, CO, USA; <sup>7</sup>Duke Cancer Institute, Duke University Medical Center, Durham, NC, USA; <sup>8</sup>SpringWorks

Therapeutics, Inc., Stamford, CT, USA; <sup>9</sup>PharPoint Research, Durham, NC, USA; <sup>10</sup>Department of Hematology and Oncology, Mayo Clinic, Jacksonville, FL, USA; <sup>11</sup>Sarcoma Oncology Center, Santa Monica, CA, USA; <sup>12</sup>Sylvester Comprehensive Cancer Center, University of Miami Health System, Miami, FL, USA; <sup>13</sup>David Geffen School of Medicine, University of California, Los Angeles, Los Angeles, CA, USA; <sup>14</sup>Sarcoma and Bone Cancer Treatment Center, Dana-Farber Cancer Institute and Harvard Medical School, Boston, MA, USA; <sup>15</sup>Washington University in St. Louis, St. Louis, MO, USA; <sup>16</sup>Department of Medicine and Surgery, Università Campus Bio-Medico di Roma and Fondazione Policlinico Universitario Campus Bio-Medico, Rome, Italy; <sup>17</sup>The Royal Marsden NHS Foundation Trust, London, UK; <sup>18</sup>Department of Medicine, Division of Oncology, Stanford Cancer Institute, Stanford, CA, USA; <sup>19</sup>University of Michigan Rogel Cancer Center, Ann Arbor, MI, USA; <sup>20</sup>The Ohio State University Comprehensive Cancer Center, Columbus, OH, USA; <sup>21</sup>Division of Hematology and Oncology, Department of Medicine, Medical College of Wisconsin, Milwaukee, WI, USA; <sup>22</sup>Department of Medical Oncology, University College London Hospital Foundation Trust, London, UK; <sup>23</sup>Division of Hematology and Oncology, Department of Medicine, University of Pennsylvania, Philadelphia, PA, USA; <sup>24</sup>Department of Medical Oncology, Ghent University Hospital, Ghent University, Ghent, Belgium; <sup>25</sup>King Albert II Cancer Institute, Cliniques Universitaires Saint-Luc, Catholic University of Louvain, Brussels, Belgium; <sup>26</sup>Osteoncology, Bone and Soft Tissue Sarcoma and Innovative Therapy Unit, IRCCS Istituto Ortopedico Rizzoli, Bologna, Italy; <sup>27</sup>Sarcoma Center Berlin-Brandenburg, HELIOS Klinikum Berlin Buch, Berlin, Germany; <sup>28</sup>Department of Medical Oncology, Fondazione IRCCS Istituto Nazionale dei Tumori, Milan, Italy; <sup>29</sup> University of Wisconsin Carbone Cancer Center, Madison, WI, USA; <sup>30</sup>University of Pittsburgh Medical Center, Pittsburgh, PA, USA; <sup>31</sup>Henri and Belinda Termeer Center for Targeted Therapies, Massachusetts General Hospital Cancer Center, Boston, MA, USA; <sup>32</sup>Knight Cancer Institute, Oregon Health & Science University, Portland, OR, USA; <sup>33</sup>Smilow Cancer Hospital, Yale Cancer Center, Yale School of Medicine, Yale University, New Haven, CT, USA; <sup>34</sup>Department

of Medical Oncology, Leiden University Medical Center, Leiden, The Netherlands; <sup>35</sup>Medical Oncology, Candiolo Cancer Institute FPO-IRCCS, Candiolo, Italy; <sup>36</sup>Medical Oncology, University of Washington, Seattle, WA, USA; <sup>37</sup>Clinical Research Division, Fred Hutchinson Cancer Research Center, Seattle, WA, USA; <sup>38</sup>Seattle Cancer Care Alliance, Seattle, WA, USA; <sup>39</sup>Northwell Health Cancer Institute, New Hyde Park, NY, USA; <sup>40</sup>Cancer and Blood Diseases Institute, Cincinnati Children's Hospital Medical Center, Cincinnati, OH, USA; <sup>41</sup>University of Heidelberg, Mannheim University Medical Center, Mannheim Cancer Center, Sarcoma Unit, Mannheim, Germany

\*MG, RR, SK, and BK contributed significantly and equally.

**Table of Contents**

|                                                                                                                                                                                                                    |    |
|--------------------------------------------------------------------------------------------------------------------------------------------------------------------------------------------------------------------|----|
| Supplementary Appendix.....                                                                                                                                                                                        | 5  |
| Table S1. Representativeness of Study Participants.....                                                                                                                                                            | 9  |
| Table S2. Confirmed Tumor Response: Intent-to-Treat Population.....                                                                                                                                                | 10 |
| Table S3. Serious Adverse Events in Safety Population .....                                                                                                                                                        | 11 |
| Figure S1. Prespecified secondary patient-reported outcome questionnaires for (A) Brief Pain Inventory Short Form, <sup>1</sup> (B) GODDESS DTSS/DTIS, <sup>2</sup> and (C) EORTC QLQ-C30. <sup>3,4,11</sup> ..... | 12 |
| Figure S2. Participant disposition. ....                                                                                                                                                                           | 14 |
| Figure S3. Spider plot of change in target lesions from baseline in tumor-evaluable participants in the (A) nirogacestat and (B) placebo arms. ....                                                                | 15 |
| REFERENCES .....                                                                                                                                                                                                   | 17 |

## Supplementary Appendix

### Methods

#### *Literature review of representativeness of study population*

To evaluate the overall representativeness of the study population in DeFi, the literature was reviewed to identify key clinical characteristics and epidemiology of this rare patient population. Online medical literature databases (PubMed) were queried with search terms for desmoid tumor or aggressive fibromatosis and the respective epidemiology or clinical characteristics. Key findings are summarized in Table S2.

#### *Trial design, data collection, analysis, and manuscript preparation*

This trial was conducted in accordance with the protocol and ethical principles derived from the Declaration of Helsinki, Council for International Organizations of Medical Sciences International Ethics Guidelines, International Council for Harmonization and Good Clinical Practice guidelines, and applicable laws and regulations.

The DeFi trial was designed by Allison Lim, L. Mary Smith, Stephanie Moody, Victor Villalobos, Shivaani Kummar, Bernd Kasper, and the study sponsor, SpringWorks Therapeutics, Inc. All authors not affiliated with SpringWorks Therapeutics were involved in gathering the data. Stephanie Moody and the study sponsor analyzed the data. All authors vouch for the data and analysis, and agree to be accountable for all aspects of the work. All authors contributed to the writing of the paper and made the decision to publish.

Many of the authors were also principal investigators for the DeFi trial clinical sites, and they and/or their institution are party to a clinical trial agreement with the sponsor, which contains standard confidentiality provisions, including ensuring that the site-specific results of the trial are not released until the sponsor-coordinated multicenter publication or a period of time has elapsed after the multicenter trial has concluded, whichever occurs earliest. In addition, the authors for this publication signed standard publication agreements with the sponsor, containing

customary confidentiality provisions concerning the nondisclosure and limited use of the full trial results solely for the purpose of developing this and other related publications in coordination with the sponsor.

#### *Prespecified subgroup analyses*

A prespecified subgroup analysis was planned for progression-free survival and objective response rate. Prespecified subgroups presented in this manuscript are:

- Sex
- Stratification factor in randomization
- Familial history of FAP
- Presence of somatic *APC* mutation
- Presence of somatic *CTNNB1* mutation
- Tumor focality
- Prior surgery
- Prior chemotherapy
- Prior tyrosine kinase inhibitor treatment
- DT treatment status

#### *Clinical and laboratory assessments*

Clinical laboratory tests were performed at screening; days 1, 8, 15, and 22 of Cycle 1; day 28 of Cycle 2; day 1 of Cycle 4; day 1 of Cycle 7 and every 3 cycles thereafter; end of treatment; and follow-up visit (if applicable). In response to early observations of ovarian dysfunction, reproductive hormone assessments in all participants (male and female) were added to the protocol with an amendment.

#### *Secondary PROs*

General and disease-specific PRO questionnaires were selected as secondary efficacy endpoints to evaluate the effect of nirogacestat on symptom burden, functioning, and health-

related quality of life. Participants completed PRO questionnaires at baseline and the start of every treatment cycle. Scores for BPI-SF and GODDESS Desmoid Tumor Symptom Scale are calculated as the average of the 7 days preceding the Cycle assessment timepoint.

Components of the key secondary PRO endpoints are described below and in Figure S1.

The BPI-SF assessment is a measurement questionnaire used to assess clinical pain. Patients rate pain severity and the degree to which pain interferes with feeling and function. The short form of the assessment used in this trial consists of 9 questions assessed on an 11-point numeric rating scale from the last 24 hours. Higher scores indicate worse pain and interference.<sup>1</sup> Clinically meaningful improvement thresholds for BPI-SF average pain and severity score are  $\geq 1$ -point decreases, corresponding to 30% to 35% decreases from baseline.<sup>1</sup>

The GODDESS questionnaire was developed by the Memorial Sloan Kettering Cancer Center and Desmoid Tumor Research Foundation to measure disease-specific symptoms and impact of desmoid tumors.<sup>2</sup> The GODDESS Desmoid Tumor Symptom Scale consists of 11 items assessing the severity of key signs and symptoms of desmoid tumors, including pain, fatigue, swelling, muscle weakness, difficulty moving, and tumor location-specific signs and symptoms. Items are assessed on an 11-point numeric rating scale from 0 (none) to 10 (as bad as you can imagine) from the last 24 hours. The GODDESS questionnaire was available in 10 languages (English, Spanish, German [Germany, Belgium], Dutch [Netherlands, Belgium], French [France, Belgium, Canadian], Italian).

The GODDESS Desmoid Tumor Impact Scale assesses 17 items relating to the impact of symptoms on functioning and daily living. The impact scale items are evaluated either with an 11-point numeric rating scale to assess severity or a 5-point Likert scale ranging from “none of the time” to “all of the time” to measure frequency of impact over the past 7 days.

Clinically meaningful improvement thresholds for the validated GODDESS Desmoid Tumor Symptom and Impact Scales are  $\geq 1.0$ -point and  $\geq 0.5$ -point decreases, respectively.<sup>12</sup>



The EORTC QLQ-C30 version 3.0 is a 30-item questionnaire composed of multi-item and single-item measures designed to assess functioning and symptoms in cancer patients. Five functional scales (physical, role, cognitive, emotional, social) and 3 symptom scales (fatigue, pain, nausea/vomiting) are assessed on a scale from 1 (not at all) to 4 (very much). Higher scores indicate worse symptom/functional burden. A global health status/quality of life scale is assessed on a scale from 1 (very poor) to 7 (excellent). Higher scores indicate better quality of life. Clinically meaningful improvement thresholds for EORTC QLQ-C30 are  $\geq 5$ -points increases.<sup>3,4</sup>

**Table S1. Representativeness of Study Participants**

| <b>Category</b>                                    | <b>Example</b>                                                                                                                                                                                                    |
|----------------------------------------------------|-------------------------------------------------------------------------------------------------------------------------------------------------------------------------------------------------------------------|
| Disease, problem, or condition under investigation | Desmoid tumors, or aggressive fibromatosis                                                                                                                                                                        |
| Special considerations related to                  |                                                                                                                                                                                                                   |
| Sex and gender                                     | Desmoid tumors occurs in both male and female patients, with a female to male ratio of ~2-3:1 <sup>5-10</sup>                                                                                                     |
| Age                                                | Desmoid tumors most commonly occurs in individuals between the ages of 15 to 60 years <sup>7-10</sup>                                                                                                             |
| Race or ethnic group                               | In a review of the literature, no significant association between racial or ethnic background and desmoid tumors was identified                                                                                   |
| Geography                                          | In a review of the literature, no clear association between geography and desmoid tumors was identified                                                                                                           |
| Overall representativeness of this trial           | The participants enrolled in DeFi demonstrated the expected ratio of women to men (65% female). The age range reported at baseline in this trial was consistent with the expected age range (range, 18-76 years). |

**Table S2. Confirmed Tumor Response: Intent-to-Treat Population**

|                                                                                     | <b>Nirogacestat<br/>n=70</b> | <b>Placebo<br/>n=72</b> |
|-------------------------------------------------------------------------------------|------------------------------|-------------------------|
| Objective response rate, n (%) [95% CI]                                             | 29 (41) [30.2, 54.5]         | 6 (8) [3.1, 17.3]       |
| <i>P</i> value                                                                      | <0.001                       |                         |
| Time to response, months, median (range)                                            | 5.6 (2.6, 19.4)              | 11.1 (2.8, 16.4)        |
| Kaplan-Meier estimate of duration of response, months, median (95% CI) <sup>a</sup> | NE (NE, NE)                  | NE (8.3, NE)            |
| Best overall response, n (%)                                                        |                              |                         |
| Complete response                                                                   | 5 (7)                        | 0                       |
| Partial response                                                                    | 24 (34)                      | 6 (8)                   |
| Stable disease                                                                      | 35 (50)                      | 55 (76)                 |
| Progressive disease                                                                 | 1 (1)                        | 10 (14)                 |
| Not evaluable                                                                       | 4 (6)                        | 1 (1)                   |
| Disease control rate, n (%)                                                         | 64 (91)                      | 61 (85)                 |

CR, complete response; NE, not estimable; PR, partial response. <sup>a</sup>Duration of objective response was defined as duration in months from the time CR or PR (whichever came first) was met until the date of progression or death.

**Table S3. Serious Adverse Events in Safety Population**

| <b>Category<sup>a</sup></b>            | <b>Nirogacestat<br/>n=69</b> | <b>Placebo<br/>n=72</b> |
|----------------------------------------|------------------------------|-------------------------|
| Any serious TEAE, n (%)                | 14 (20)                      | 8 (11)                  |
| Premature menopause <sup>b</sup>       | 3 (4)                        | 0                       |
| Tumor hemorrhage                       | 1 (1)                        | 1 (1)                   |
| Abdominal abscess                      | 1 (1)                        | 0                       |
| Abdominal infection                    | 1 (1)                        | 0                       |
| Appendicitis                           | 1 (1)                        | 0                       |
| Groin abscess                          | 1 (1)                        | 0                       |
| Infected cyst                          | 1 (1)                        | 0                       |
| Ovarian failure <sup>b</sup>           | 1 (1)                        | 0                       |
| Abdominal pain                         | 1 (1)                        | 0                       |
| Small intestinal obstruction           | 1 (1)                        | 0                       |
| Stomatitis                             | 1 (1)                        | 0                       |
| Spindle cell sarcoma                   | 1 (1)                        | 0                       |
| Tumor pain                             | 1 (1)                        | 1 (1)                   |
| Atrial fibrillation                    | 1 (1)                        | 0                       |
| Cholecystitis                          | 1 (1)                        | 0                       |
| Hematuria                              | 1 (1)                        | 0                       |
| Rash, maculopapular                    | 1 (1)                        | 0                       |
| Sepsis                                 | 0                            | 3 (4)                   |
| Drug-induced liver injury              | 0                            | 1 (1)                   |
| COVID-19                               | 0                            | 2 (3)                   |
| Infection                              | 0                            | 1 (1)                   |
| Diarrhea                               | 0                            | 1 (1)                   |
| Duodenal perforation                   | 0                            | 1 (1)                   |
| Gastrointestinal fistula               | 0                            | 1 (1)                   |
| Pulmonary embolism                     | 0                            | 1 (1)                   |
| Treatment-related serious TEAEs, n (%) | 9 (13)                       | 0                       |
| Premature menopause <sup>b</sup>       | 3 (4)                        | 0                       |
| Ovarian failure <sup>b</sup>           | 1 (1)                        | 0                       |
| Groin abscess                          | 1 (1)                        | 0                       |
| Infected cyst                          | 1 (1)                        | 0                       |
| Atrial fibrillation                    | 1 (1)                        | 0                       |
| Stomatitis                             | 1 (1)                        | 0                       |
| Cholecystitis                          | 1 (1)                        | 0                       |
| Rash, maculopapular                    | 1 (1)                        | 0                       |

COVID-19, coronavirus disease 2019; TEAE, treatment-emergent adverse event. <sup>a</sup>All data are presented as n (%). <sup>b</sup>These events were reported as serious because of medical importance. However, after a protocol amendment, subsequent events of ovarian dysfunction were designated by the investigator as TEAEs of special interest.

**Figure S1. Prespecified secondary patient-reported outcome questionnaires for (A) Brief Pain Inventory Short Form,<sup>1</sup> (B) GODDESS DTSS/DTIS,<sup>2</sup> and (C) EORTC QLQ-C30.<sup>3,4,11</sup> ©**

2022 Memorial Sloan Kettering Cancer Center, et al. All rights reserved. The content and design of this questionnaire are protected by US and international copyright laws. This questionnaire or any portion thereof may not be reproduced, distributed, altered, or used in any manner without

prior written consent from Memorial Sloan Kettering Cancer Center. If you require further information on a permitted use or a license to use any content, email

[MarComReview@mskcc.org](mailto:MarComReview@mskcc.org). DTIS, Desmoid Tumor Impact Scale; DTSS, Desmoid Tumor Symptom Scale; EORTC QLQ-C30, European Organisation for Research and Treatment of Cancer Quality of Life Questionnaire-Core 30; GODDESS, GOunder/Desmoid Tumor Research Foundation DEsmoid Symptom/Impact Scale.

A

**Brief Pain Inventory Short Form – Average Pain Intensity**

| AVERAGE PAIN                   |   |   |   |   |   |   |   |   |   |    |
|--------------------------------|---|---|---|---|---|---|---|---|---|----|
| Worst pain in last 24 hours    |   |   |   |   |   |   |   |   |   |    |
| 0                              | 1 | 2 | 3 | 4 | 5 | 6 | 7 | 8 | 9 | 10 |
| No pain                        |   |   |   |   |   |   |   |   |   |    |
| Pain as bad as you can imagine |   |   |   |   |   |   |   |   |   |    |

B

**GODDESS**

**DTSS**

| PAIN          | EXTRA-ABDOMINAL   | INTRA-ABDOMINAL | OTHER   |
|---------------|-------------------|-----------------|---------|
| Pain          | Swelling          | Abdominal pain  | Fatigue |
| Dull pain     | Muscle weakness   | Nausea          |         |
| Shooting pain | Difficulty moving | Fullness        |         |

**DTIS**

| SLEEP              | PHYSICAL             | EMOTIONAL                 | OTHER                           |
|--------------------|----------------------|---------------------------|---------------------------------|
| Falling asleep     | Moving               | Fear of tests             | Avoidance because of appearance |
| Comfortable in bed | Reaching (frequency) | Fear of growth/recurrence | Reaching (difficulty)           |
| Staying asleep     | Vigorous activity    | Hopelessness              | Dissatisfied with appearance    |
|                    | Moderate activity    | Anger                     |                                 |
|                    | Accomplished less    | Anxiety                   |                                 |
|                    |                      | Frustration               |                                 |

C

**EORTC QLQ-C30 (version 3)**

| PHYSICAL FUNCTIONING       | ROLE FUNCTIONING               | GLOBAL HEALTH STATUS/ QUALITY OF LIFE |
|----------------------------|--------------------------------|---------------------------------------|
| Strenuous activities       | Work and daily activities      | Overall health                        |
| Long walk                  |                                |                                       |
| Short walk                 | Hobbies and leisure activities | Overall quality of life               |
| Stay in bed                |                                |                                       |
| Help with daily activities |                                |                                       |

**Figure S2. Participant disposition.** <sup>a</sup>Participants who took at least 1 dose of treatment were included in the safety population. <sup>b</sup>Adverse events leading to discontinuation of nirogacestat were diarrhea (n=4), premature menopause (n=3), alanine aminotransferase increase (n=3), aspartate aminotransferase increase (n=2), vomiting (n=1), ovarian failure (n=1), decreased appetite (n=1), hypophosphatemia (n=1), fatigue (n=1), Sjogren's syndrome (n=1), mental impairment (n=1), maculopapular rash (n=1), and hot flush (n=1). In 3 participants, >1 adverse event was associated with premature discontinuation. <sup>c</sup>Adverse events leading to discontinuation of placebo were drug-induced liver injury (n=1). <sup>d</sup>Number of events reflects total resulting in the discontinuation of study treatment not in the analysis of progression-free survival. <sup>e</sup>At the time of analysis.

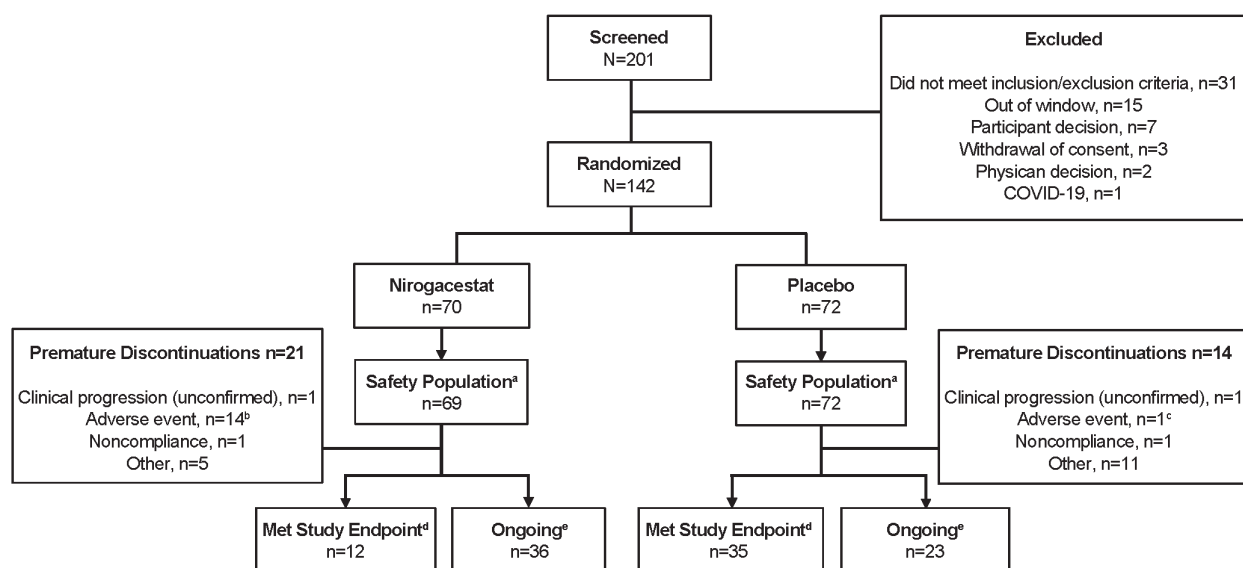

**Figure S3. Spider plot of change in target lesions from baseline in tumor-evaluable participants in the (A) nirogacestat and (B) placebo arms. Color coded by complete response + partial response, stable disease, and progressive disease.**

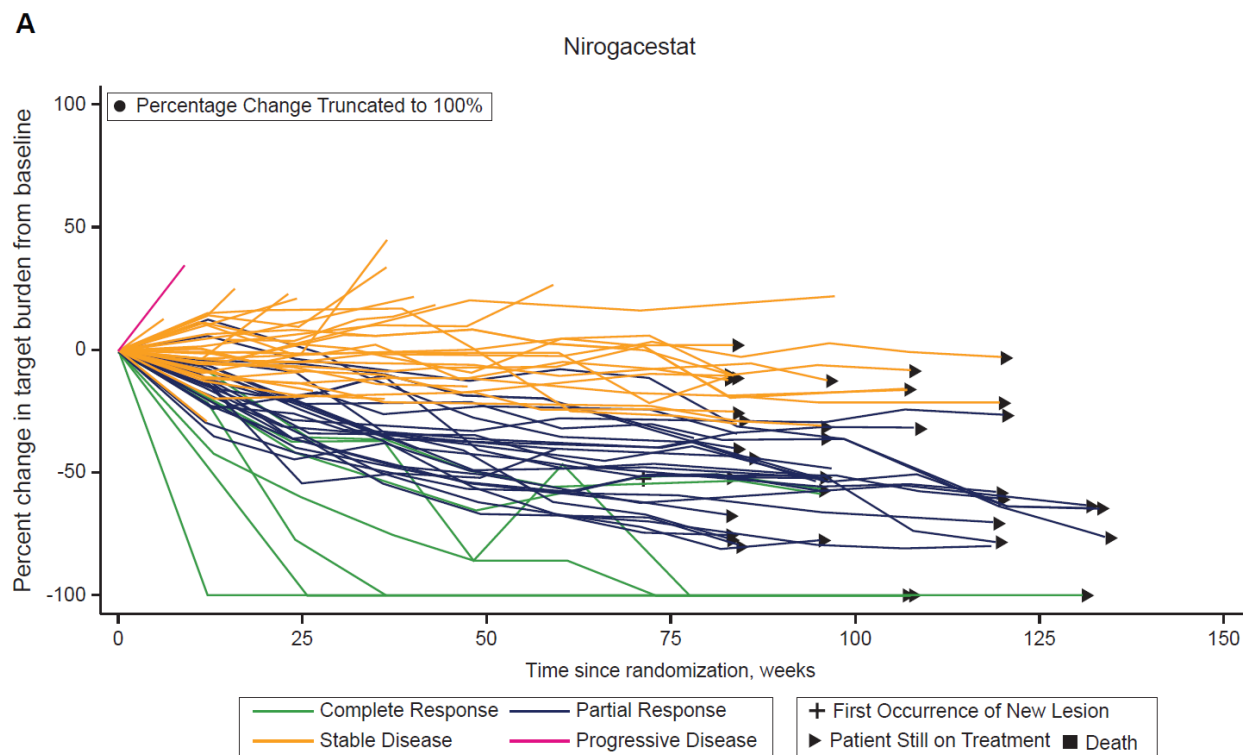



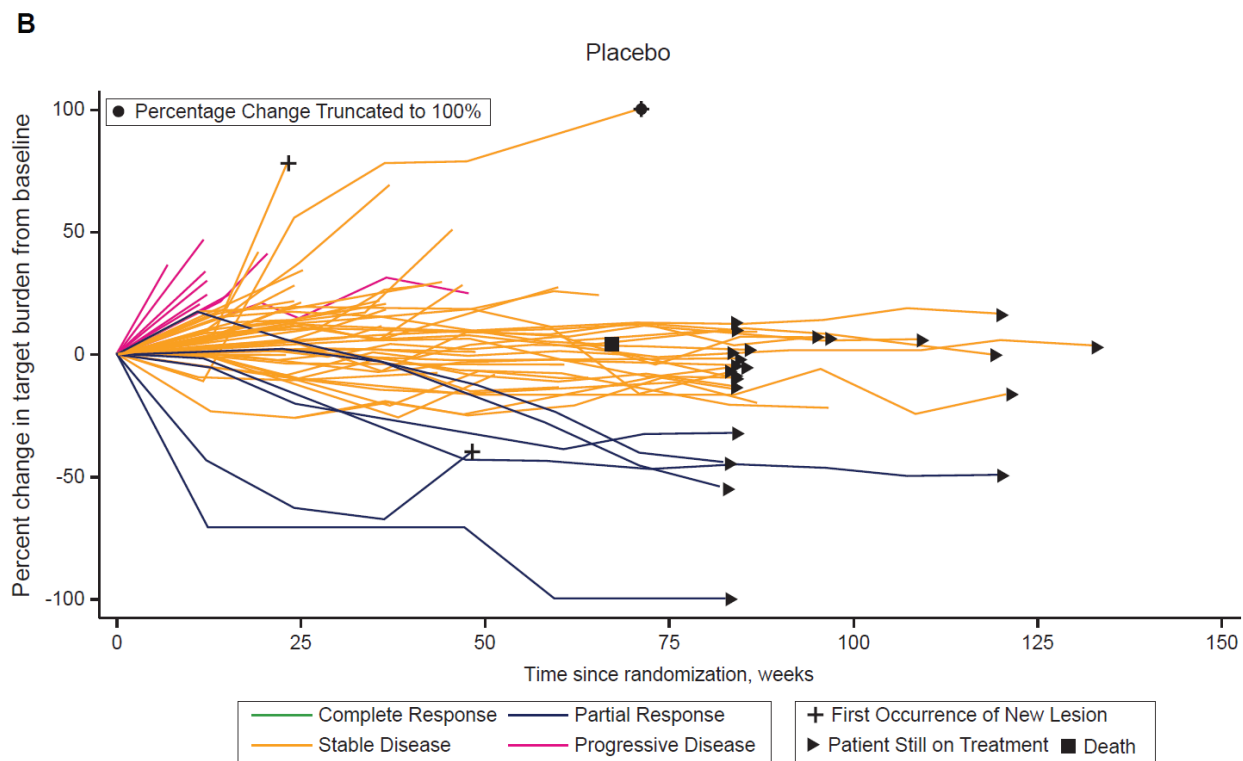

## REFERENCES

1. Mease PJ, Spaeth M, Clauw DJ, et al. Estimation of minimum clinically important difference for pain in fibromyalgia. *Arthritis Care Res (Hoboken)* 2011;63:821-6.
2. Gounder MM, Maddux L, Paty J, Atkinson TM. Prospective development of a patient-reported outcomes instrument for desmoid tumors or aggressive fibromatosis. *Cancer* 2020;126:531-9.
3. Osoba D, Rodrigues G, Myles J, Zee B, Pater J. Interpreting the significance of changes in health-related quality-of-life scores. *J Clin Oncol* 1998;16:139-44.
4. Musoro JZ, Coens C, Fiteni F, et al. Minimally important differences for interpreting EORTC QLQ-C30 scores in patients with advanced breast cancer. *JNCI Cancer Spectr* 2019;3:pkz037.
5. Penel N, Coindre J-M, Bonvalot S, et al. Management of desmoid tumours: a nationwide survey of labelled reference centre networks in France. *Eur J Cancer* 2016;58:90-6.
6. Skubitz KM. Biology and treatment of aggressive fibromatosis or desmoid tumor. *Mayo Clin Proc* 2017;92:947-64.
7. van Broekhoven DL, Grünhagen DJ, den Bakker MA, van Dalen T, Verhoef C. Time trends in the incidence and treatment of extra-abdominal and abdominal aggressive fibromatosis: a population-based study. *Ann Surg Oncol* 2015;22:2817-23.
8. Anneberg M, Svane HML, Fryzek J, et al. The epidemiology of desmoid tumors in Denmark. *Cancer Epidemiol* 2022;77:102114.
9. Reitamo JJ, Scheinin TM, Häyry P. The desmoid syndrome. New aspects in the cause, pathogenesis and treatment of the desmoid tumor. *Am J Surg* 1986;151:230-7.

10. Nieuwenhuis MH, Casparie M, Mathus-Vliegen LM, Dekkers OM, Hogendoorn PC, Vasen HF. A nation-wide study comparing sporadic and familial adenomatous polyposis-related desmoid-type fibromatoses. *Int J Cancer* 2011;129:256-61.
11. EORTC QLQ-C30 (version 3). Sample questionnaire. Accessed July 14, 2022. Copyright 1995 EORTC Quality of Life Group.  
<https://www.eortc.org/app/uploads/sites/2/2018/08/Specimen-QLQ-C30-English.pdf>.
12. Gounder MM, Atkinson TM, Bell T, Daskalopoulou C, Griffiths P, Martindale M, Lim A. Gounder/Desmoid Tumor Research Foundation DEsmoid Symptom/Impact Scale (GODDESS): psychometric properties and clinically meaningful thresholds as assessed in the phase 3 DeFi randomized controlled clinical trial. Poster presented at: Desmoid Tumor Research Foundation Virtual Weekend. September 23-25, 2022; Virtual.
