# Supplementary material
Source: PubMed Central journal article supplement (PMC11225596)
Supplement: NIHMS2002375-supplement-Data_Sharing.pdf [file NIHMS2002375-supplement-Data_Sharing.pdf]

## Data Sharing Statement

Gounder M, Ratan R, Alcindor T, et al. Nirogacestat, a  $\gamma$ -Secretase Inhibitor for Desmoid Tumors. N Engl J Med. DOI: 10.1056/NEJMoa2210140.

| Question                                                            | Authors' Response                                                                                                                                                                                                                                                                                                                                                                                                                                                                                                                             |
|---------------------------------------------------------------------|-----------------------------------------------------------------------------------------------------------------------------------------------------------------------------------------------------------------------------------------------------------------------------------------------------------------------------------------------------------------------------------------------------------------------------------------------------------------------------------------------------------------------------------------------|
| Will the data collected for your study be made available to others? | Yes                                                                                                                                                                                                                                                                                                                                                                                                                                                                                                                                           |
| Would you like to offer context for your decision?                  | —                                                                                                                                                                                                                                                                                                                                                                                                                                                                                                                                             |
| Which data?                                                         | —                                                                                                                                                                                                                                                                                                                                                                                                                                                                                                                                             |
| Additional information about data                                   | —                                                                                                                                                                                                                                                                                                                                                                                                                                                                                                                                             |
| How or where can the data be obtained?                              | SpringWorks Therapeutics is committed to data transparency and sharing data to further research while maintaining the privacy and confidentiality of research participants. Pertinent patient-level data from completed registrational clinical trials will be made available by SpringWorks to qualified researchers upon approval of reasonable requests following de-identification/anonymization pursuant to applicable law. Requests for data must be sent to <a href="mailto:medinfo@springworkstx.com">medinfo@springworkstx.com</a> . |
| When will data availability begin?                                  | After publication and marketing authorization in US (or development discontinued), subject to review                                                                                                                                                                                                                                                                                                                                                                                                                                          |
| When will data availability end?                                    | There is no end date for eligibility to submit a data sharing request                                                                                                                                                                                                                                                                                                                                                                                                                                                                         |
| Will any supporting documents be available?                         | —                                                                                                                                                                                                                                                                                                                                                                                                                                                                                                                                             |
| Which supporting documents?                                         | —                                                                                                                                                                                                                                                                                                                                                                                                                                                                                                                                             |
| Additional information about supporting documents                   | —                                                                                                                                                                                                                                                                                                                                                                                                                                                                                                                                             |
| How or where can supporting documents be obtained?                  | —                                                                                                                                                                                                                                                                                                                                                                                                                                                                                                                                             |
| When will supporting documents availability begin?                  | —                                                                                                                                                                                                                                                                                                                                                                                                                                                                                                                                             |
| When will supporting documents availability end?                    | —                                                                                                                                                                                                                                                                                                                                                                                                                                                                                                                                             |
| To whom will data be available?                                     | —                                                                                                                                                                                                                                                                                                                                                                                                                                                                                                                                             |
| For what type of analysis or purpose?                               | —                                                                                                                                                                                                                                                                                                                                                                                                                                                                                                                                             |
| By what mechanism?                                                  | —                                                                                                                                                                                                                                                                                                                                                                                                                                                                                                                                             |

|                         |   |
|-------------------------|---|
| Any other restrictions? | — |
| Additional information  | — |

This statement was posted on March 9, 2023, at NEJM.org.
