# Supplementary material
Source: PubMed Central journal article supplement (PMC11225596)
Supplement: NIHMS2002375-supplement-Disclosures.pdf [file NIHMS2002375-supplement-Disclosures.pdf]

**Discloser Identifier:** 435827

**Disclosure Purpose:** 22-10140

## Summary of Interests

### Company or Organization

| Entity                                                                                              | Type       | Interest Held By |
|-----------------------------------------------------------------------------------------------------|------------|------------------|
| Astellas Pharma Canada                                                                              | Consultant | Self             |
| <i>Category:</i> Consultant<br><i>Description:</i> Advisory board<br><i>Additional Information:</i> |            |                  |
| AstraZeneca Canada                                                                                  | Consultant | Self             |
| <i>Category:</i> Consultant<br><i>Description:</i> Advisory board<br><i>Additional Information:</i> |            |                  |
| Bayer                                                                                               | Consultant | Self             |
| <i>Category:</i> Consultant<br><i>Description:</i> Advisory board<br><i>Additional Information:</i> |            |                  |
| Bristol-Myers Squibb Canada                                                                         | Consultant | Self             |
| <i>Category:</i> Consultant<br><i>Description:</i> Advisory board<br><i>Additional Information:</i> |            |                  |
| Hoffmann-La Roche Limited                                                                           | Consultant | Self             |
| <i>Category:</i> Consultant<br><i>Description:</i> Advisory board<br><i>Additional Information:</i> |            |                  |
| Merck                                                                                               | Consultant | Self             |
| <i>Category:</i> Consultant<br><i>Description:</i> Advisory board<br><i>Additional Information:</i> |            |                  |
| Novartis                                                                                            | Consultant | Self             |
| <i>Category:</i> Consultant<br><i>Description:</i> Advisory board<br><i>Additional Information:</i> |            |                  |
| Taiho Pharmaceutical                                                                                | Consultant | Self             |
| <i>Category:</i> Consultant<br><i>Description:</i> Advisory board<br><i>Additional Information:</i> |            |                  |

## Additional Questions

1. **Are there other relationships or activities that readers could perceive to have influenced, or that give the appearance of potentially influencing, what you wrote in the submitted work?**

No.

2. **What is the manuscript title?**

Nirogacestat: A Gamma Secretase Inhibitor for Desmoid Tumors (DeFi Trial)

3. **Are you the corresponding author?**

No.

## Certification

I certify that the information provided in this disclosure is complete and accurate.

Discloser Identifier: 808781

Disclosure Purpose: 22-10140

## Summary of Interests

### Company or Organization

| Entity                                                                                                                              | Type             | Interest Held By                                                                |
|-------------------------------------------------------------------------------------------------------------------------------------|------------------|---------------------------------------------------------------------------------|
| AB Science                                                                                                                          | Grant / Contract | Other - Clinical study support                                                  |
| <i>Recipient Name:</i> Mayo Clinic<br><i>Grant / Contract Description:</i> Clinical trial support<br><i>Additional Information:</i> |                  | <i>Recipient Type:</i> Institution<br><i>Grant / Contract Purpose:</i> Research |
| Adaptimmune                                                                                                                         | Grant / Contract | Other - clinical trial support                                                  |
| <i>Recipient Name:</i> Mayo Clinic<br><i>Grant / Contract Description:</i> clinical trial support<br><i>Additional Information:</i> |                  | <i>Recipient Type:</i> Institution<br><i>Grant / Contract Purpose:</i> Research |
| Advenchen                                                                                                                           | Grant / Contract | Other - Clinical trial support                                                  |
| <i>Recipient Name:</i> Mayo Clinic<br><i>Grant / Contract Description:</i> Clinical trial support<br><i>Additional Information:</i> |                  | <i>Recipient Type:</i> Institution<br><i>Grant / Contract Purpose:</i> Research |
| Ayala Pharma                                                                                                                        | Grant / Contract | Other - Clinical trial support                                                  |
| <i>Recipient Name:</i> Mayo Clinic<br><i>Grant / Contract Description:</i> Clinical trial support<br><i>Additional Information:</i> |                  | <i>Recipient Type:</i> Institution<br><i>Grant / Contract Purpose:</i> Research |
| Bavarian Nordic A/S                                                                                                                 | Grant / Contract | Other - Clinical trial support                                                  |
| <i>Recipient Name:</i> Mayo Clinic<br><i>Grant / Contract Description:</i> Clinical trial support<br><i>Additional Information:</i> |                  | <i>Recipient Type:</i> Institution<br><i>Grant / Contract Purpose:</i> Research |
| Bayer HealthCare Pharmaceuticals Inc.                                                                                               | Grant / Contract | Other - clinical trial support                                                  |
| <i>Recipient Name:</i> Mayo Clinic<br><i>Grant / Contract Description:</i> clinical trial support<br><i>Additional Information:</i> |                  | <i>Recipient Type:</i> Institution<br><i>Grant / Contract Purpose:</i> Research |
| Blueprint Medicines Corporation                                                                                                     | Grant / Contract | Other - clinical trial support                                                  |
| <i>Recipient Name:</i> Mayo Clinic<br><i>Grant / Contract Description:</i> clinical trial support<br><i>Additional Information:</i> |                  | <i>Recipient Type:</i> Institution<br><i>Grant / Contract Purpose:</i> Research |
| Boehringer Ingelheim                                                                                                                | Grant / Contract | Other - clinical trial support                                                  |
| <i>Recipient Name:</i> Mayo Clinic<br><i>Grant / Contract Description:</i><br><i>Additional Information:</i>                        |                  | <i>Recipient Type:</i> Institution<br><i>Grant / Contract Purpose:</i> Research |

| Entity                                                                                                                              | Type             | Interest Held By                                                                |
|-------------------------------------------------------------------------------------------------------------------------------------|------------------|---------------------------------------------------------------------------------|
| BTG pharma                                                                                                                          | Grant / Contract | Other - Clinical trial support                                                  |
| <i>Recipient Name:</i> Mayo Clinic<br><i>Grant / Contract Description:</i> Clinical trial support<br><i>Additional Information:</i> |                  | <i>Recipient Type:</i> Institution<br><i>Grant / Contract Purpose:</i> Research |
| C4 Therapeutics                                                                                                                     | Grant / Contract | Other - study support                                                           |
| <i>Recipient Name:</i> Mayo Clinic<br><i>Grant / Contract Description:</i> study support<br><i>Additional Information:</i>          |                  | <i>Recipient Type:</i> Institution<br><i>Grant / Contract Purpose:</i> Research |
| CBA pharma                                                                                                                          | Grant / Contract | Other - clinical trial support                                                  |
| <i>Recipient Name:</i> Mayo Clinic<br><i>Grant / Contract Description:</i> clinical trial support<br><i>Additional Information:</i> |                  | <i>Recipient Type:</i> Institution<br><i>Grant / Contract Purpose:</i> Research |
| Daiichi Sankyo Inc.                                                                                                                 | Grant / Contract | Other - study support                                                           |
| <i>Recipient Name:</i> Mayo Clinic<br><i>Grant / Contract Description:</i> study support<br><i>Additional Information:</i>          |                  | <i>Recipient Type:</i> Institution<br><i>Grant / Contract Purpose:</i> Research |
| Deciphera Pharmaceuticals Inc.                                                                                                      | Grant / Contract | Other - clinical trial support                                                  |
| <i>Recipient Name:</i> Mayo Clinic<br><i>Grant / Contract Description:</i> clinical trial support<br><i>Additional Information:</i> |                  | <i>Recipient Type:</i> Institution<br><i>Grant / Contract Purpose:</i> Research |
| Desmoid Tumor Research Foundation                                                                                                   | Grant / Contract | Other - clinical trial support                                                  |
| <i>Recipient Name:</i> Mayo Clinic<br><i>Grant / Contract Description:</i> clinical trial support<br><i>Additional Information:</i> |                  | <i>Recipient Type:</i> Institution<br><i>Grant / Contract Purpose:</i> Research |
| Eli Lilly and Company                                                                                                               | Grant / Contract | Other - clinical trial support                                                  |
| <i>Recipient Name:</i> Mayo Clinic<br><i>Grant / Contract Description:</i> clinical trial support<br><i>Additional Information:</i> |                  | <i>Recipient Type:</i> Institution<br><i>Grant / Contract Purpose:</i> Research |
| Epizyme, Inc.,                                                                                                                      | Grant / Contract | Other - clinical trial support                                                  |
| <i>Recipient Name:</i> Mayo Clinic<br><i>Grant / Contract Description:</i> clinical trial support<br><i>Additional Information:</i> |                  | <i>Recipient Type:</i><br><i>Grant / Contract Purpose:</i> Research             |
| Forma Pharma                                                                                                                        | Grant / Contract | Other - Clinical trial support                                                  |
| <i>Recipient Name:</i> Mayo Clinic<br><i>Grant / Contract Description:</i> Clinical trial support<br><i>Additional Information:</i> |                  | <i>Recipient Type:</i> Institution<br><i>Grant / Contract Purpose:</i> Research |
| Genmab                                                                                                                              | Grant / Contract | Other - clinical trial support                                                  |
| <i>Recipient Name:</i> Mayo Clinic<br><i>Grant / Contract Description:</i> clinical trial support<br><i>Additional Information:</i> |                  | <i>Recipient Type:</i> Institution<br><i>Grant / Contract Purpose:</i> Research |
| GlaxoSmithKline, LLC.                                                                                                               | Grant / Contract | Other - Clinical trial support                                                  |

| Entity                                                                                                                              | Type             | Interest Held By               |
|-------------------------------------------------------------------------------------------------------------------------------------|------------------|--------------------------------|
| <i>Recipient Name:</i> Mayo Clinic<br><i>Grant / Contract Description:</i> Clinical trial support<br><i>Additional Information:</i> |                  |                                |
| <i>Recipient Type:</i> Individual<br><i>Grant / Contract Purpose:</i> Research                                                      |                  |                                |
| Gradilis                                                                                                                            | Grant / Contract | Other - clinical trial support |
| <i>Recipient Name:</i> Mayo Clinic<br><i>Grant / Contract Description:</i> clinical trial support<br><i>Additional Information:</i> |                  |                                |
| <i>Recipient Type:</i> Institution<br><i>Grant / Contract Purpose:</i> Research                                                     |                  |                                |
| Incyte Corporation                                                                                                                  | Grant / Contract | Other - clinical trial support |
| <i>Recipient Name:</i> Mayo Clinic<br><i>Grant / Contract Description:</i> clinical trial support<br><i>Additional Information:</i> |                  |                                |
| <i>Recipient Type:</i> Institution<br><i>Grant / Contract Purpose:</i> Research                                                     |                  |                                |
| InhibRx                                                                                                                             | Grant / Contract | Other - study support          |
| <i>Recipient Name:</i> Mayo Clinic<br><i>Grant / Contract Description:</i> study support<br><i>Additional Information:</i>          |                  |                                |
| <i>Recipient Type:</i> Institution<br><i>Grant / Contract Purpose:</i> Research                                                     |                  |                                |
| Karyopharm Therapeutics Inc.                                                                                                        | Grant / Contract | Other - clinical trial support |
| <i>Recipient Name:</i> Mayo Clinic<br><i>Grant / Contract Description:</i> clinical trial support<br><i>Additional Information:</i> |                  |                                |
| <i>Recipient Type:</i> Institution<br><i>Grant / Contract Purpose:</i> Research                                                     |                  |                                |
| Merck                                                                                                                               | Grant / Contract | Other - clinical trial support |
| <i>Recipient Name:</i> Mayo Clinic<br><i>Grant / Contract Description:</i> clinical trial support<br><i>Additional Information:</i> |                  |                                |
| <i>Recipient Type:</i> Institution<br><i>Grant / Contract Purpose:</i> Research                                                     |                  |                                |
| Monopar Pharma                                                                                                                      | Grant / Contract | Other - Study support          |
| <i>Recipient Name:</i> Mayo Clinic<br><i>Grant / Contract Description:</i> study support<br><i>Additional Information:</i>          |                  |                                |
| <i>Recipient Type:</i> Institution<br><i>Grant / Contract Purpose:</i> Research                                                     |                  |                                |
| Novartis                                                                                                                            | Grant / Contract | Other - clinical trial support |
| <i>Recipient Name:</i> Mayo Clinic<br><i>Grant / Contract Description:</i> clinical trial support<br><i>Additional Information:</i> |                  |                                |
| <i>Recipient Type:</i> Institution<br><i>Grant / Contract Purpose:</i> Research                                                     |                  |                                |
| Noxopharm                                                                                                                           | Grant / Contract | Other - study support          |
| <i>Recipient Name:</i> Mayo Clinic<br><i>Grant / Contract Description:</i> study support<br><i>Additional Information:</i>          |                  |                                |
| <i>Recipient Type:</i> Institution<br><i>Grant / Contract Purpose:</i> Research                                                     |                  |                                |
| Philogen                                                                                                                            | Grant / Contract | Other - clinical trial support |
| <i>Recipient Name:</i> Mayo Clinic<br><i>Grant / Contract Description:</i> clinical trial support<br><i>Additional Information:</i> |                  |                                |
| <i>Recipient Type:</i> Institution<br><i>Grant / Contract Purpose:</i> Research                                                     |                  |                                |
| PTC pharma                                                                                                                          | Grant / Contract | Other - Clinical trial support |

| Entity                                                                                                                              | Type             | Interest Held By               |
|-------------------------------------------------------------------------------------------------------------------------------------|------------------|--------------------------------|
| <i>Recipient Name:</i> Mayo Clinic<br><i>Grant / Contract Description:</i> Clinical trial support<br><i>Additional Information:</i> |                  |                                |
| <i>Recipient Type:</i> Institution<br><i>Grant / Contract Purpose:</i> Research                                                     |                  |                                |
| Rain Therapeutics                                                                                                                   | Grant / Contract | Other - study support          |
| <i>Recipient Name:</i> Mayo Clinic<br><i>Grant / Contract Description:</i> study support<br><i>Additional Information:</i>          |                  |                                |
| <i>Recipient Type:</i> Institution<br><i>Grant / Contract Purpose:</i> Research                                                     |                  |                                |
| Salarius Pharma                                                                                                                     | Grant / Contract | Other - Study support          |
| <i>Recipient Name:</i> Mayo Clinic<br><i>Grant / Contract Description:</i> Study support<br><i>Additional Information:</i>          |                  |                                |
| <i>Recipient Type:</i> Institution<br><i>Grant / Contract Purpose:</i> Research                                                     |                  |                                |
| Springworks                                                                                                                         | Grant / Contract | Other - clinical trial support |
| <i>Recipient Name:</i> Mayo Clinic<br><i>Grant / Contract Description:</i> clinical trial support<br><i>Additional Information:</i> |                  |                                |
| <i>Recipient Type:</i> Institution<br><i>Grant / Contract Purpose:</i> Research                                                     |                  |                                |
| Takeda Oncology                                                                                                                     | Grant / Contract | Other - clinical trial support |
| <i>Recipient Name:</i> Mayo Clinic<br><i>Grant / Contract Description:</i> clinical trial support<br><i>Additional Information:</i> |                  |                                |
| <i>Recipient Type:</i> Institution<br><i>Grant / Contract Purpose:</i> Research                                                     |                  |                                |
| Theseus Pharma                                                                                                                      | Grant / Contract | Other - study support          |
| <i>Recipient Name:</i> Mayo Clinic<br><i>Grant / Contract Description:</i> study support<br><i>Additional Information:</i>          |                  |                                |
| <i>Recipient Type:</i> Institution<br><i>Grant / Contract Purpose:</i> Research                                                     |                  |                                |
| TRACON Pharma                                                                                                                       | Grant / Contract | Other - clinical trial support |
| <i>Recipient Name:</i> Mayo Clinic<br><i>Grant / Contract Description:</i> clinical trial support<br><i>Additional Information:</i> |                  |                                |
| <i>Recipient Type:</i> Institution<br><i>Grant / Contract Purpose:</i> Research                                                     |                  |                                |
| Trillium Pharma                                                                                                                     | Grant / Contract | Other - Clinical trial support |
| <i>Recipient Name:</i> Mayo Clinic<br><i>Grant / Contract Description:</i> Clinical trial support<br><i>Additional Information:</i> |                  |                                |
| <i>Recipient Type:</i> Institution<br><i>Grant / Contract Purpose:</i> Research                                                     |                  |                                |

## Additional Questions

1. **Are there other relationships or activities that readers could perceive to have influenced, or that give the appearance of potentially influencing, what you wrote in the submitted work?**

No.

2. **What is the manuscript title?**

"Nirogacestat: A Gamma-Secretase Inhibitor for Desmoid Tumors (DeFi Trial)"

3. **Are you the corresponding author?**

No.

## Certification

I certify that the information provided in this disclosure is complete and accurate.

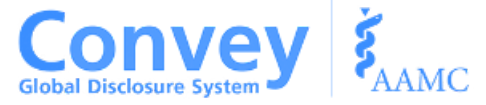

Howard Bailey

**Discloser Identifier:** 1087983

**Disclosure Purpose:** 22-10140

## Summary of Interests

I do not have any interests to disclose at this time.

## Additional Questions

1. **Are there other relationships or activities that readers could perceive to have influenced, or that give the appearance of potentially influencing, what you wrote in the submitted work?**

No.

2. **What is the manuscript title?**

Nirogacestat: A Gamma Secretase Inhibitor for Desmoid Tumors (DeFi Trial)

3. **Are you the corresponding author?**

No.

## Certification

I certify that the information provided in this disclosure is complete and accurate.



Charlotte Benson

**Discloser Identifier:** 931641

**Disclosure Purpose:** 22-10140

## Summary of Interests

I do not have any interests to disclose at this time.

## Additional Questions

1. **Are there other relationships or activities that readers could perceive to have influenced, or that give the appearance of potentially influencing, what you wrote in the submitted work?**

No.

2. **What is the manuscript title?**

Nirogacestat: A Gamma Secretase Inhibitor for Desmoid Tumors (DeFi Trial)

3. **Are you the corresponding author?**

No.

## Certification

I certify that the information provided in this disclosure is complete and accurate.

Nam Bui

Discloser Identifier: 867731

Disclosure Purpose: 22-10140

## Summary of Interests

### Company or Organization

| Entity                                                                                                                              | Type       | Interest Held By |
|-------------------------------------------------------------------------------------------------------------------------------------|------------|------------------|
| Rain Therapeutics                                                                                                                   | Consultant | Self             |
| <i>Category:</i> Consultant<br><i>Description:</i> Advisory Board<br><i>Additional Information:</i> Advisory Board Meeting, 2 hours |            |                  |
| SpringWorks                                                                                                                         | Consultant | Self             |
| <i>Category:</i> Consultant<br><i>Description:</i> Advisory Board<br><i>Additional Information:</i> Advisory Board, 3 hours         |            |                  |

## Additional Questions

1. **Are there other relationships or activities that readers could perceive to have influenced, or that give the appearance of potentially influencing, what you wrote in the submitted work?**

No.

2. **What is the manuscript title?**

Nirogacestat: A Gamma-Secretase Inhibitor for Desmoid Tumors (DeFi Trial)" to the New England Journal of Medicine

3. **Are you the corresponding author?**

No.

## Certification

I certify that the information provided in this disclosure is complete and accurate.

Melissa Burgess

**Discloser Identifier:** 1014116

**Disclosure Purpose:** 22-10140

## Summary of Interests

I do not have any interests to disclose at this time.

## Additional Questions

1. **Are there other relationships or activities that readers could perceive to have influenced, or that give the appearance of potentially influencing, what you wrote in the submitted work?**

No.

2. **What is the manuscript title?**

Nirogacestat, A Gamma Secretase Inhibitor for treatment of Desmoid Tumors: a multicenter, randomised versus placebo, phase 3 trial (DeFi Trial)

3. **Are you the corresponding author?**

No.

## Certification

I certify that the information provided in this disclosure is complete and accurate.

John Charlson

**Discloser Identifier:** 1087959

**Disclosure Purpose:** 22-10140

## Summary of Interests

### Company or Organization

| Entity                                                                                                           | Type                       | Interest Held By |
|------------------------------------------------------------------------------------------------------------------|----------------------------|------------------|
| ayala                                                                                                            | Data And Safety Monitoring | Self             |
| <i>Category:</i> Data And Safety Monitoring<br><i>Description:</i> DSMB member<br><i>Additional Information:</i> |                            |                  |
| Deciphera Pharmaceuticals Inc.                                                                                   | Consultant                 | Self             |
| <i>Category:</i> Consultant<br><i>Description:</i> Consultant<br><i>Additional Information:</i>                  |                            |                  |
| springworks                                                                                                      | Consultant                 | Self             |
| <i>Category:</i> Consultant<br><i>Description:</i> Advisory Board<br><i>Additional Information:</i>              |                            |                  |

## Additional Questions

**1. Are there other relationships or activities that readers could perceive to have influenced, or that give the appearance of potentially influencing, what you wrote in the submitted work?**

No.

**2. What is the manuscript title?**

Nirogacestat: A Gamma-Secretase Inhibitor for Desmoid Tumors (DeFi Trial)

**3. Are you the corresponding author?**

No.

## Certification

I certify that the information provided in this disclosure is complete and accurate.



**Discloser Identifier:** 854083

**Disclosure Purpose:** 22-10140

## Summary of Interests

### Company or Organization

| Entity                         | Type  | Interest Held By |
|--------------------------------|-------|------------------|
| Aadi Bioscience                | Stock | Self             |
| <i>Additional Information:</i> |       |                  |
| Cellestia Biotech AG           | Stock | Self             |
| <i>Additional Information:</i> |       |                  |
| Counterpoint Biomedica LLC     | Stock | Self             |
| <i>Additional Information:</i> |       |                  |
| IMMIX Biopharma                | Stock | Self             |
| <i>Additional Information:</i> |       |                  |

## Additional Questions

**1. Are there other relationships or activities that readers could perceive to have influenced, or that give the appearance of potentially influencing, what you wrote in the submitted work?**

No.

**2. What is the manuscript title?**

Nirogacestat: A Gamma Secretase Inhibitor for Desmoid Tumors (DeFi Trial)

**3. Are you the corresponding author?**

No.

## Certification

I certify that the information provided in this disclosure is complete and accurate.



Discloser Identifier: 402749

Disclosure Purpose: 22-10140

## Summary of Interests

### Company or Organization

| Entity                                                                                                                                            | Type             | Interest Held By                                                                |
|---------------------------------------------------------------------------------------------------------------------------------------------------|------------------|---------------------------------------------------------------------------------|
| AADi                                                                                                                                              | Grant / Contract | Self                                                                            |
| <i>Recipient Name:</i> Regents of University of Michigan<br><i>Grant / Contract Description:</i> Clinical trial<br><i>Additional Information:</i> |                  | <i>Recipient Type:</i> Institution<br><i>Grant / Contract Purpose:</i> Research |
| Advenchen                                                                                                                                         | Grant / Contract | Self                                                                            |
| <i>Recipient Name:</i> Regents of University of Michigan<br><i>Grant / Contract Description:</i><br><i>Additional Information:</i>                |                  | <i>Recipient Type:</i> Institution<br><i>Grant / Contract Purpose:</i>          |
| AstraZeneca                                                                                                                                       | Grant / Contract | Self                                                                            |
| <i>Recipient Name:</i> Regents of University of Michigan<br><i>Grant / Contract Description:</i><br><i>Additional Information:</i>                |                  | <i>Recipient Type:</i> Institution<br><i>Grant / Contract Purpose:</i> Research |
| AstraZeneca Pharmaceuticals LP                                                                                                                    | Grant / Contract | Self                                                                            |
| <i>Recipient Name:</i> Regents of University of Michigan<br><i>Grant / Contract Description:</i><br><i>Additional Information:</i>                |                  | <i>Recipient Type:</i> Institution<br><i>Grant / Contract Purpose:</i> Research |
| Ayala                                                                                                                                             | Grant / Contract | Self                                                                            |
| <i>Recipient Name:</i> Regents of University of Michigan<br><i>Grant / Contract Description:</i><br><i>Additional Information:</i>                |                  | <i>Recipient Type:</i> Institution<br><i>Grant / Contract Purpose:</i>          |
| Comprehensive Cancer Center, University of Michigan                                                                                               | Employment       | Self                                                                            |
| <i>Title:</i> Professor of Internal Medicine<br><i>Additional Information:</i>                                                                    |                  | <i>Position Description:</i>                                                    |
| Cornerstone Pharmaceuticals                                                                                                                       | Grant / Contract | Self                                                                            |
| <i>Recipient Name:</i> Regents of University of Michigan<br><i>Grant / Contract Description:</i><br><i>Additional Information:</i>                |                  | <i>Recipient Type:</i> Institution<br><i>Grant / Contract Purpose:</i> Research |
| Deciphera Pharmaceuticals Inc.                                                                                                                    | Consultant       | Self                                                                            |
| <i>Category:</i> Consultant<br><i>Description:</i><br><i>Additional Information:</i>                                                              |                  |                                                                                 |
| Epizyme, Inc.,                                                                                                                                    | Grant / Contract | Self                                                                            |



| Entity                                                                                                                                                                                                                                 | Type             | Interest Held By |
|----------------------------------------------------------------------------------------------------------------------------------------------------------------------------------------------------------------------------------------|------------------|------------------|
| <p><i>Recipient Name:</i> Regents of University of Michigan<br/> <i>Grant / Contract Description:</i><br/> <i>Additional Information:</i></p> <p><i>Recipient Type:</i> Institution<br/> <i>Grant / Contract Purpose:</i></p>          |                  |                  |
| Epizyme, Inc.,                                                                                                                                                                                                                         | Consultant       | Self             |
| <p><i>Category:</i> Consultant<br/> <i>Description:</i><br/> <i>Additional Information:</i></p>                                                                                                                                        |                  |                  |
| GlaxoSmithKline                                                                                                                                                                                                                        | Grant / Contract | Self             |
| <p><i>Recipient Name:</i> Regents of University of Michigan<br/> <i>Grant / Contract Description:</i><br/> <i>Additional Information:</i></p> <p><i>Recipient Type:</i> Institution<br/> <i>Grant / Contract Purpose:</i> Research</p> |                  |                  |
| GlaxoSmithKline, LLC.                                                                                                                                                                                                                  | Grant / Contract | Self             |
| <p><i>Recipient Name:</i> Regents of University of Michigan<br/> <i>Grant / Contract Description:</i><br/> <i>Additional Information:</i></p> <p><i>Recipient Type:</i> Institution<br/> <i>Grant / Contract Purpose:</i> Research</p> |                  |                  |
| Incyte Corporation                                                                                                                                                                                                                     | Grant / Contract | Self             |
| <p><i>Recipient Name:</i> Regents at University of Michigan<br/> <i>Grant / Contract Description:</i><br/> <i>Additional Information:</i></p> <p><i>Recipient Type:</i> Institution<br/> <i>Grant / Contract Purpose:</i> Research</p> |                  |                  |
| Ipsen Biopharmaceuticals, Inc                                                                                                                                                                                                          | Consultant       | Self             |
| <p><i>Category:</i> Consultant<br/> <i>Description:</i><br/> <i>Additional Information:</i></p>                                                                                                                                        |                  |                  |
| Janssen Biotech                                                                                                                                                                                                                        | Grant / Contract | Self             |
| <p><i>Recipient Name:</i> Regents of University of Michigan<br/> <i>Grant / Contract Description:</i><br/> <i>Additional Information:</i></p> <p><i>Recipient Type:</i> Institution<br/> <i>Grant / Contract Purpose:</i> Research</p> |                  |                  |
| Jazz Pharmaceuticals                                                                                                                                                                                                                   | Consultant       | Self             |
| <p><i>Category:</i> Consultant<br/> <i>Description:</i><br/> <i>Additional Information:</i></p>                                                                                                                                        |                  |                  |
| Medivation Inc.                                                                                                                                                                                                                        | Grant / Contract | Self             |
| <p><i>Recipient Name:</i> Regents of University of Michigan<br/> <i>Grant / Contract Description:</i><br/> <i>Additional Information:</i></p> <p><i>Recipient Type:</i> Institution<br/> <i>Grant / Contract Purpose:</i></p>          |                  |                  |
| Mundipharma                                                                                                                                                                                                                            | Grant / Contract | Self             |
| <p><i>Recipient Name:</i> Regents of University of Michigan<br/> <i>Grant / Contract Description:</i><br/> <i>Additional Information:</i></p> <p><i>Recipient Type:</i> Institution<br/> <i>Grant / Contract Purpose:</i> Research</p> |                  |                  |
| Novartis                                                                                                                                                                                                                               | Grant / Contract | Self             |

| Entity                                                                                                                             | Type             | Interest Held By |
|------------------------------------------------------------------------------------------------------------------------------------|------------------|------------------|
| <i>Recipient Name:</i> Regents of University of Michigan<br><i>Grant / Contract Description:</i><br><i>Additional Information:</i> |                  |                  |
| <i>Recipient Type:</i> Institution<br><i>Grant / Contract Purpose:</i>                                                             |                  |                  |
| Pfizer                                                                                                                             | Grant / Contract | Self             |
| <i>Recipient Name:</i> Regents of University of Michigan<br><i>Grant / Contract Description:</i><br><i>Additional Information:</i> |                  |                  |
| <i>Recipient Type:</i> Institution<br><i>Grant / Contract Purpose:</i> Research                                                    |                  |                  |
| Pfizer Inc.                                                                                                                        | Grant / Contract | Self             |
| <i>Recipient Name:</i> Regents of University of Michigan<br><i>Grant / Contract Description:</i><br><i>Additional Information:</i> |                  |                  |
| <i>Recipient Type:</i> Institution<br><i>Grant / Contract Purpose:</i> Research                                                    |                  |                  |
| Plexikon Inc.                                                                                                                      | Grant / Contract | Self             |
| <i>Recipient Name:</i> Regents of University of Michigan<br><i>Grant / Contract Description:</i><br><i>Additional Information:</i> |                  |                  |
| <i>Recipient Type:</i> Institution<br><i>Grant / Contract Purpose:</i> Research                                                    |                  |                  |
| Qilu Puget Sound                                                                                                                   | Grant / Contract | Self             |
| <i>Recipient Name:</i> Regents of University of Michigan<br><i>Grant / Contract Description:</i><br><i>Additional Information:</i> |                  |                  |
| <i>Recipient Type:</i> Institution<br><i>Grant / Contract Purpose:</i>                                                             |                  |                  |
| Springworks                                                                                                                        | Grant / Contract | Self             |
| <i>Recipient Name:</i> Regents of University of Michigan<br><i>Grant / Contract Description:</i><br><i>Additional Information:</i> |                  |                  |
| <i>Recipient Type:</i> Institution<br><i>Grant / Contract Purpose:</i> Research                                                    |                  |                  |

## Intellectual Property

| Type                                                                                                                                                  | Is Licensed | Interest Held By |
|-------------------------------------------------------------------------------------------------------------------------------------------------------|-------------|------------------|
| Other Intellectual Property - Write electronic updates for UpToDate, Inc- onlin                                                                       | -           | Self             |
| <i>Description:</i> Write electronic updates for UpToDate, Inc- online medical information resource<br><i>Type:</i><br><i>Additional Information:</i> |             |                  |

## Additional Questions

1. **Are there other relationships or activities that readers could perceive to have influenced, or that give the appearance of potentially influencing, what you wrote in the submitted work?**

No.

2. **What is the manuscript title?**

Nirogacestat: A Gamma Secretase Inhibitor for Desmoid Tumors (DeFI Trial)

3. **Are you the corresponding author?**

No.

## Certification

I certify that the information provided in this disclosure is complete and accurate.

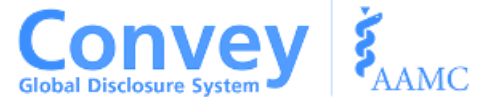

Discloser Identifier: 524114

Disclosure Purpose: 22-10140

## Summary of Interests

### Company or Organization

| Entity                                                                                                                                | Type       | Interest Held By                                            |
|---------------------------------------------------------------------------------------------------------------------------------------|------------|-------------------------------------------------------------|
| Bioatla                                                                                                                               | Consultant | Self                                                        |
| <i>Category:</i> Consultant<br><i>Description:</i> advisory board<br><i>Additional Information:</i>                                   |            |                                                             |
| C4Therapeutics                                                                                                                        | Consultant | Self                                                        |
| <i>Category:</i> Consultant<br><i>Description:</i> advisory board<br><i>Additional Information:</i>                                   |            |                                                             |
| Eisai                                                                                                                                 | Consultant | Self                                                        |
| <i>Category:</i> Consultant<br><i>Description:</i> invited to discuss eribulin in vascular sarcomas<br><i>Additional Information:</i> |            |                                                             |
| Foghorn                                                                                                                               | Consultant | Self                                                        |
| <i>Category:</i> Consultant<br><i>Description:</i> advisory board<br><i>Additional Information:</i>                                   |            |                                                             |
| Ikena                                                                                                                                 | Consultant | Self                                                        |
| <i>Category:</i> Consultant<br><i>Description:</i> advisory board<br><i>Additional Information:</i>                                   |            |                                                             |
| Massachusetts General Hospital                                                                                                        | Employment | Self                                                        |
| <i>Title:</i> Assistant Professor of Medicine<br><i>Additional Information:</i>                                                       |            | <i>Position Description:</i> physician, hematology/oncology |
| PharmaMar                                                                                                                             | Consultant | Self                                                        |
| <i>Category:</i> Consultant<br><i>Description:</i> advisory board<br><i>Additional Information:</i>                                   |            |                                                             |

### Additional Questions

**1. Are there other relationships or activities that readers could perceive to have influenced, or that give the appearance of potentially influencing, what you wrote in the submitted work?**

No.

**2. What is the manuscript title?**

Nirogacestat, a Gamma-Secretase Inhibitor for Desmoid Tumors

**3. Are you the corresponding author?**

No.

## Certification

I certify that the information provided in this disclosure is complete and accurate.

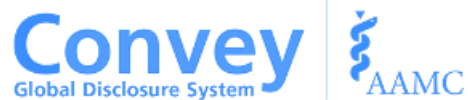

**Discloser Identifier:** 878321

**Disclosure Purpose:** 22-10140

## Summary of Interests

I do not have any interests to disclose at this time.

## Additional Questions

1. **Are there other relationships or activities that readers could perceive to have influenced, or that give the appearance of potentially influencing, what you wrote in the submitted work?**

No.

2. **What is the manuscript title?**

"Nirogacestat: A Gamma Secretase Inhibitor for Desmoid Tumors (DeFi Trial)"

3. **Are you the corresponding author?**

No.

## Certification

I certify that the information provided in this disclosure is complete and accurate.

Lara Davis

Discloser Identifier: 509669

Disclosure Purpose: 22-10140

## Summary of Interests

### Company or Organization

| Entity                                                                                                                                                                                                                      | Type       | Interest Held By |
|-----------------------------------------------------------------------------------------------------------------------------------------------------------------------------------------------------------------------------|------------|------------------|
| Daichi Sankyo Company                                                                                                                                                                                                       | Consultant | Self             |
| <i>Category:</i> Consultant<br><i>Description:</i><br><i>Additional Information:</i> Pexidartinib Advisory Board member in August 2020 and December 2020. Workshop participant regarding pexidartinib dosing in March 2022. |            |                  |

## Additional Questions

1. **Are there other relationships or activities that readers could perceive to have influenced, or that give the appearance of potentially influencing, what you wrote in the submitted work?**

No.

2. **What is the manuscript title?**

Nirogacestat: A Gamma-Secretase Inhibitor for Desmoid Tumors (DeFi Trial)

3. **Are you the corresponding author?**

No.

## Certification

I certify that the information provided in this disclosure is complete and accurate.

Discloser Identifier: 754587

Disclosure Purpose: 22-10140

## Summary of Interests

### Company or Organization

| Entity                                                                                                                                                                                             | Type       | Interest Held By |
|----------------------------------------------------------------------------------------------------------------------------------------------------------------------------------------------------|------------|------------------|
| Blueprint Medicines Corporation                                                                                                                                                                    | Other      | Self             |
| <i>Category:</i> Other<br><i>Description:</i> Advisory board<br><i>Additional Information:</i> Virtual advisory board                                                                              |            |                  |
| Daiichi Sankyo Company                                                                                                                                                                             | Other      | Self             |
| <i>Category:</i> Other<br><i>Description:</i> Advisory Board<br><i>Additional Information:</i> 1 day advisory board meeting                                                                        |            |                  |
| Deciphera Pharmaceuticals Inc.                                                                                                                                                                     | Consultant | Self             |
| <i>Category:</i> Consultant<br><i>Description:</i> Consultant in 2020 and 2021 for discussions about use of repriminib<br><i>Additional Information:</i> 4 virtual meetings a year for 1 hour each |            |                  |
| Exelixis                                                                                                                                                                                           | Other      | Self             |
| <i>Category:</i> Other<br><i>Description:</i> Advisory Boards<br><i>Additional Information:</i> Virtual Advisory Board                                                                             |            |                  |

## Additional Questions

1. **Are there other relationships or activities that readers could perceive to have influenced, or that give the appearance of potentially influencing, what you wrote in the submitted work?**

No.

2. **What is the manuscript title?**

Nirogacestat, a Novel Gamma Secretase Inhibitor for Desmoid Tumors

3. **Are you the corresponding author?**

No.

## Certification

I certify that the information provided in this disclosure is complete and accurate.





Palma Dileo

**Discloser Identifier:** 890249

**Disclosure Purpose:** 22-10140

## Summary of Interests

### Company or Organization

| Entity                                                                                                            | Type           | Interest Held By |
|-------------------------------------------------------------------------------------------------------------------|----------------|------------------|
| Deciphera Pharmaceuticals Inc.                                                                                    | Expert Witness | Self             |
| <i>Category:</i> Expert Witness<br><i>Description:</i> Deciphera Advisory Board<br><i>Additional Information:</i> |                |                  |

## Additional Questions

1. **Are there other relationships or activities that readers could perceive to have influenced, or that give the appearance of potentially influencing, what you wrote in the submitted work?**

No.

2. **What is the manuscript title?**

Nirogacestat, a Novel Gamma Secretase Inhibitor for Desmoid Tumors

3. **Are you the corresponding author?**

No.

## Certification

I certify that the information provided in this disclosure is complete and accurate.

Noah Federman

Discloser Identifier: 425671

Disclosure Purpose: 22-10140

## Summary of Interests

### Company or Organization

| Entity                                                                                               | Type                       | Interest Held By |
|------------------------------------------------------------------------------------------------------|----------------------------|------------------|
| AYALA                                                                                                | Data And Safety Monitoring | Self             |
| <i>Category:</i> Data And Safety Monitoring<br><i>Description:</i><br><i>Additional Information:</i> |                            |                  |
| Bayer                                                                                                | Other                      | Self             |
| <i>Category:</i> Other<br><i>Description:</i> Speaker Bureau<br><i>Additional Information:</i>       |                            |                  |
| genmab                                                                                               | Stock                      | Self             |
| <i>Additional Information:</i>                                                                       |                            |                  |
| Tempus Labs                                                                                          | Consultant                 | Self             |
| <i>Category:</i> Consultant<br><i>Description:</i><br><i>Additional Information:</i>                 |                            |                  |

## Additional Questions

1. **Are there other relationships or activities that readers could perceive to have influenced, or that give the appearance of potentially influencing, what you wrote in the submitted work?**

No.

2. **What is the manuscript title?**

Nirogacestat a novel gamma secretase inhibitor for desmoid tumors

3. **Are you the corresponding author?**

No.

## Certification

I certify that the information provided in this disclosure is complete and accurate.



Hans Gelderblom

**Discloser Identifier:** 517367

**Disclosure Purpose:** 22-10140

## Summary of Interests

I do not have any interests to disclose at this time.

## Additional Questions

1. **Are there other relationships or activities that readers could perceive to have influenced, or that give the appearance of potentially influencing, what you wrote in the submitted work?**

No.

2. **What is the manuscript title?**

Nirogacestat, : A Gamma Secretase Inhibitor for treatment of Desmoid Tumors: a multicenter, randomised versus placebo, phase 3 trial (DeFi Trial)

3. **Are you the corresponding author?**

No.

## Certification

I certify that the information provided in this disclosure is complete and accurate.

Discloser Identifier: 682794

Disclosure Purpose: 22-10140

## Summary of Interests

### Company or Organization

| Entity                                                                                                                                                                                                 | Type             | Interest Held By                                                                |
|--------------------------------------------------------------------------------------------------------------------------------------------------------------------------------------------------------|------------------|---------------------------------------------------------------------------------|
| Ayala                                                                                                                                                                                                  | Consultant       | Self                                                                            |
| <i>Category:</i> Consultant<br><i>Description:</i> Medical Advisory Board<br><i>Additional Information:</i>                                                                                            |                  |                                                                                 |
| Bayer Healthcare                                                                                                                                                                                       | Consultant       | Self                                                                            |
| <i>Category:</i> Consultant<br><i>Description:</i> Sorafenib in desmoid tumor<br><i>Additional Information:</i>                                                                                        |                  |                                                                                 |
| Boehringer Ingelheim                                                                                                                                                                                   | Consultant       | Self                                                                            |
| <i>Category:</i> Consultant<br><i>Description:</i> MDM2 inhibitors in oncology<br><i>Additional Information:</i>                                                                                       |                  |                                                                                 |
| Epizyme, Inc.,                                                                                                                                                                                         | Consultant       | Self                                                                            |
| <i>Category:</i> Consultant<br><i>Description:</i> Tazemetstat in Epithelioid sarcoma<br><i>Additional Information:</i>                                                                                |                  |                                                                                 |
| Food and Drug Administration                                                                                                                                                                           | Grant / Contract | Self                                                                            |
| <i>Recipient Name:</i> Mrinal Gounder<br><i>Grant / Contract Description:</i> R01 FD005105<br><i>Additional Information:</i>                                                                           |                  | <i>Recipient Type:</i> Individual<br><i>Grant / Contract Purpose:</i> Research  |
| Karyopharm Therapeutics                                                                                                                                                                                | Consultant       | Self                                                                            |
| <i>Category:</i> Consultant<br><i>Description:</i> Selinexor in liposarcoma<br><i>Additional Information:</i>                                                                                          |                  |                                                                                 |
| National Cancer Institute                                                                                                                                                                              | Grant / Contract | Other - MSKCC                                                                   |
| <i>Recipient Name:</i> MSKCC<br><i>Grant / Contract Description:</i> National Institutes of Health (P30CA008748 core grant (CCSG shared resources and core facility)<br><i>Additional Information:</i> |                  | <i>Recipient Type:</i> Institution<br><i>Grant / Contract Purpose:</i> Research |
| Rain Therapeutics                                                                                                                                                                                      | Consultant       | Self                                                                            |
| <i>Category:</i> Consultant<br><i>Description:</i> Medical Advisory Board<br><i>Additional Information:</i>                                                                                            |                  |                                                                                 |

| Entity                                                                                                      | Type       | Interest Held By |
|-------------------------------------------------------------------------------------------------------------|------------|------------------|
| Regeneron Pharmaceuticals                                                                                   | Consultant | Self             |
| <i>Category:</i> Consultant<br><i>Description:</i> Medical Advisory Board<br><i>Additional Information:</i> |            |                  |
| Springworks Therapeutics                                                                                    | Consultant | Self             |
| <i>Category:</i> Consultant<br><i>Description:</i> Medical Advisory Board<br><i>Additional Information:</i> |            |                  |

## Intellectual Property

| Type                                                                                                      | Is Licensed | Interest Held By                                                                                              |
|-----------------------------------------------------------------------------------------------------------|-------------|---------------------------------------------------------------------------------------------------------------|
| Other Intellectual Property - GODDESS - Gounder/DTRF Desmoid Symptom/Impact Sca                           | -           | Other - License held by MSKCC. License fees for commercial use is utilized towards research in desmoid tumors |
| <i>Description:</i> GODDESS - Gounder/DTRF Desmoid Symptom/Impact Scale<br><i>Additional Information:</i> |             | <i>Type:</i> Patient Reported Outcomes Questionnaire                                                          |
| Other Intellectual Property - UpToDate royalty                                                            | -           | Self                                                                                                          |
| <i>Description:</i> UpToDate royalty<br><i>Additional Information:</i>                                    |             | <i>Type:</i> Honorarium                                                                                       |

## Additional Questions

1. **Are there other relationships or activities that readers could perceive to have influenced, or that give the appearance of potentially influencing, what you wrote in the submitted work?**

No.

2. **What is the manuscript title?**

Nirogacestat: A Gamma-Secretase Inhibitor for Desmoid Tumors (DeFi Trial)

3. **Are you the corresponding author?**

Yes.

- a. **Please list the other authors' names here.**

Ravin Ratan, MD, M.Ed; Thierry Alcindor, MD, MSc; Patrick Schöffski, MD, MPH; Winette T. van der Graaf, MD, PhD; Breelyn A. Wilky, MD; Richard F. Riedel, MD; Allison Lim, PharmD; L. Mary Smith, PhD; Stephanie Moody, MS; Steven Attia, DO; Sant Chawla, MD, FRACP; Gina D'Amato, MD; Noah Federman, MD; Priscilla Merriam, MD; Brian A. Van Tine, MD, PhD; Bruno Vincenzi, PhD; Charlotte Benson, MBChB; Nam Quoc Bui, MD; Rashmi Chugh, MD; Gabriel Tinoco, MD; John Charlson, MD; Palma Dileo, MD; Lee Hartner, MD; Lore Lapeire, MD; Filomena Mazzeo, MD; Emanuela Palmerini, MD; Peter Reichardt, PhD; Silvia Stacchiotti, MD; Howard H. Bailey, MD; Melissa A. Burgess, MD; Gregory M. Cote, PhD; Lara E. Davis, MD; Hari Deshpande, MD; Hans Gelderblom, MD, PhD; Giovanni Grignani, MD; Elizabeth Loggers, MD, PhD, FAAHPM; Tony Philip, MD; Joseph G. Pressey, MD; Shivaani Kummar, MD, FACP;\* Bernd Kasper, MD, PhD

## Certification

I certify that the information provided in this disclosure is complete and accurate.

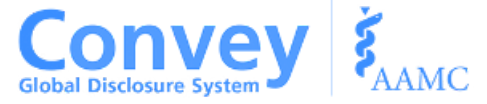



Discloser Identifier: 628891

Disclosure Purpose: 22-10140

## Summary of Interests

### Company or Organization

| Entity                                                                                                                            | Type             | Interest Held By                                                                       |
|-----------------------------------------------------------------------------------------------------------------------------------|------------------|----------------------------------------------------------------------------------------|
| Eli Lilly and Company                                                                                                             | Grant / Contract | Self                                                                                   |
| <i>Recipient Name:</i> Giovanni Grignani<br><i>Grant / Contract Description:</i> Advisory Board<br><i>Additional Information:</i> |                  | <i>Recipient Type:</i> Individual<br><i>Grant / Contract Purpose:</i> Other - personal |
| GlaxoSmithKline                                                                                                                   | Grant / Contract | Self                                                                                   |
| <i>Recipient Name:</i> Giovanni Grignani<br><i>Grant / Contract Description:</i> Grant<br><i>Additional Information:</i>          |                  | <i>Recipient Type:</i> Individual<br><i>Grant / Contract Purpose:</i> Research         |
| Merck                                                                                                                             | Grant / Contract | Self                                                                                   |
| <i>Recipient Name:</i> Giovanni Grignani<br><i>Grant / Contract Description:</i> Advisory board<br><i>Additional Information:</i> |                  | <i>Recipient Type:</i> Individual<br><i>Grant / Contract Purpose:</i> Other - personal |
| Novartis                                                                                                                          | Grant / Contract | Self                                                                                   |
| <i>Recipient Name:</i> Giovanni Grignani<br><i>Grant / Contract Description:</i> Advisory board<br><i>Additional Information:</i> |                  | <i>Recipient Type:</i> Individual<br><i>Grant / Contract Purpose:</i> Research         |
| Pharmamar                                                                                                                         | Grant / Contract | Self                                                                                   |
| <i>Recipient Name:</i><br><i>Grant / Contract Description:</i> Grant<br><i>Additional Information:</i>                            |                  | <i>Recipient Type:</i> Individual<br><i>Grant / Contract Purpose:</i> Research         |

## Additional Questions

1. Are there other relationships or activities that readers could perceive to have influenced, or that give the appearance of potentially influencing, what you wrote in the submitted work?

No.

2. What is the manuscript title?

Nirogacestat, a Novel Gamma Secretase Inhibitor for Desmoid Tumors

3. Are you the corresponding author?

No.

## Certification

I certify that the information provided in this disclosure is complete and accurate.



Discloser Identifier: 1014453

Disclosure Purpose: 22-10140

## Summary of Interests

### Company or Organization

| Entity                                                                                                                                                    | Type       | Interest Held By |
|-----------------------------------------------------------------------------------------------------------------------------------------------------------|------------|------------------|
| Amgen                                                                                                                                                     | Other      | Self             |
| <i>Category:</i> Other<br><i>Description:</i> Clinical Trial enrolled<br><i>Additional Information:</i>                                                   |            |                  |
| Eli Lilly and Company                                                                                                                                     | Other      | Self             |
| <i>Category:</i> Other<br><i>Description:</i> Clinical Trial Enrolled<br><i>Additional Information:</i>                                                   |            |                  |
| Karyopharm Therapeutics Inc.                                                                                                                              | Other      | Self             |
| <i>Category:</i> Other<br><i>Description:</i> Clinical Trial Enroller<br><i>Additional Information:</i>                                                   |            |                  |
| Perelman School of Medicine, University of Pennsylvania                                                                                                   | Employment | Self             |
| <i>Title:</i> Clinical Associate Professor of Medicine<br><i>Additional Information:</i> <i>Position Description:</i> Hematologist/Oncologist in practice |            |                  |

## Additional Questions

1. **Are there other relationships or activities that readers could perceive to have influenced, or that give the appearance of potentially influencing, what you wrote in the submitted work?**

No.

2. **What is the manuscript title?**

Nirogacestat: A Gamma-Secretase Inhibitor for Desmoid Tumors (DeFi Trial)

3. **Are you the corresponding author?**

No.

## Certification

I certify that the information provided in this disclosure is complete and accurate.



Bernd Kasper

Discloser Identifier: 1014477

Disclosure Purpose: 22-10140

## Summary of Interests

### Company or Organization

| Entity                                                                               | Type       | Interest Held By |
|--------------------------------------------------------------------------------------|------------|------------------|
| Ayala                                                                                | Consultant | Self             |
| <i>Category:</i> Consultant<br><i>Description:</i><br><i>Additional Information:</i> |            |                  |
| Springworks Therapeutics                                                             | Consultant | Self             |
| <i>Category:</i> Consultant<br><i>Description:</i><br><i>Additional Information:</i> |            |                  |

## Additional Questions

1. **Are there other relationships or activities that readers could perceive to have influenced, or that give the appearance of potentially influencing, what you wrote in the submitted work?**

No.

2. **What is the manuscript title?**

Nirogacestat: A Gamma-Secretase Inhibitor for Desmoid Tumors (DeFi Trial)

3. **Are you the corresponding author?**

No.

## Certification

I certify that the information provided in this disclosure is complete and accurate.

**Discloser Identifier:** 1087964

**Disclosure Purpose:** 22-10140

## Summary of Interests

### Company or Organization

| Entity                                                                                               | Type                       | Interest Held By |
|------------------------------------------------------------------------------------------------------|----------------------------|------------------|
| Arxeon                                                                                               | Stock                      | Spouse/Partner   |
| <i>Additional Information:</i>                                                                       |                            |                  |
| Bayer HealthCare Pharmaceuticals Inc.                                                                | Consultant                 | Self             |
| <i>Category:</i> Consultant<br><i>Description:</i><br><i>Additional Information:</i>                 |                            |                  |
| Boehringer Ingelheim                                                                                 | Consultant                 | Self             |
| <i>Category:</i> Consultant<br><i>Description:</i><br><i>Additional Information:</i>                 |                            |                  |
| cadila                                                                                               | Consultant                 | Spouse/Partner   |
| <i>Category:</i> Consultant<br><i>Description:</i><br><i>Additional Information:</i>                 |                            |                  |
| Gilead Sciences Inc                                                                                  | Consultant                 | Self             |
| <i>Category:</i> Consultant<br><i>Description:</i><br><i>Additional Information:</i>                 |                            |                  |
| Harbour Biomed                                                                                       | Consultant                 | Self             |
| <i>Category:</i> Consultant<br><i>Description:</i><br><i>Additional Information:</i>                 |                            |                  |
| Mirati                                                                                               | Data And Safety Monitoring | Self             |
| <i>Category:</i> Data And Safety Monitoring<br><i>Description:</i><br><i>Additional Information:</i> |                            |                  |
| MundiBiopharma                                                                                       | Consultant                 | Self             |
| <i>Category:</i> Consultant<br><i>Description:</i><br><i>Additional Information:</i>                 |                            |                  |
| Oxford Biotherapeutics                                                                               | Consultant                 | Self             |

| Entity                                                                               | Type       | Interest Held By |
|--------------------------------------------------------------------------------------|------------|------------------|
| <i>Category:</i> Consultant<br><i>Description:</i><br><i>Additional Information:</i> |            |                  |
| Pathomiq                                                                             | Stock      | Self             |
| <i>Additional Information:</i>                                                       |            |                  |
| Springworks Therapeutics                                                             | Consultant | Self             |
| <i>Category:</i> Consultant<br><i>Description:</i><br><i>Additional Information:</i> |            |                  |

## Additional Questions

1. **Are there other relationships or activities that readers could perceive to have influenced, or that give the appearance of potentially influencing, what you wrote in the submitted work?**

No.

2. **What is the manuscript title?**

Nirogacestat: A Gamma-Secretase Inhibitor for Desmoid Tumors (DeFi Trial)

3. **Are you the corresponding author?**

No.

## Certification

I certify that the information provided in this disclosure is complete and accurate.

Lore Lapeire

**Discloser Identifier:** 1087960

**Disclosure Purpose:** 22-10140

## Summary of Interests

I do not have any interests to disclose at this time.

## Additional Questions

1. **Are there other relationships or activities that readers could perceive to have influenced, or that give the appearance of potentially influencing, what you wrote in the submitted work?**

No.

2. **What is the manuscript title?**

Nirogacestat: A Gamma-Secretase Inhibitor for Desmoid Tumors (DeFi Trial)

3. **Are you the corresponding author?**

No.

## Certification

I certify that the information provided in this disclosure is complete and accurate.



Allison Lim

Discloser Identifier: 1087841

Disclosure Purpose: 22-10140

## Summary of Interests

### Company or Organization

| Entity                                                                      | Type         | Interest Held By                                       |
|-----------------------------------------------------------------------------|--------------|--------------------------------------------------------|
| SpringWorks Therapeutics                                                    | Employment   | Self                                                   |
| <i>Title:</i> VP Global Disease Area Lead<br><i>Additional Information:</i> |              | <i>Position Description:</i> Clinical Development Lead |
| SpringWorks Therapeutics                                                    | Stock        | Self                                                   |
| <i>Additional Information:</i>                                              |              |                                                        |
| SpringWorks Therapeutics                                                    | Stock Option | Self                                                   |
| Additional Information:                                                     |              |                                                        |

## Additional Questions

1. **Are there other relationships or activities that readers could perceive to have influenced, or that give the appearance of potentially influencing, what you wrote in the submitted work?**

No.

2. **What is the manuscript title?**

Nirogacestat: A Gamma-Secretase Inhibitor for Desmoid Tumors (DeFi Trial)

3. **Are you the corresponding author?**

No.

## Certification

I certify that the information provided in this disclosure is complete and accurate.

Discloser Identifier: 1014114

Disclosure Purpose: 22-10140

## Summary of Interests

### Company or Organization

| Entity                                                                                                                                    | Type             | Interest Held By                                                                |
|-------------------------------------------------------------------------------------------------------------------------------------------|------------------|---------------------------------------------------------------------------------|
| Ayala Pharma                                                                                                                              | Grant / Contract | Self                                                                            |
| <i>Recipient Name:</i> University of Washington<br><i>Grant / Contract Description:</i> Clinical trial<br><i>Additional Information:</i>  |                  | <i>Recipient Type:</i> Institution<br><i>Grant / Contract Purpose:</i> Research |
| BioAtla                                                                                                                                   | Grant / Contract | Self                                                                            |
| <i>Recipient Name:</i> University of Washington<br><i>Grant / Contract Description:</i> Clinical trials<br><i>Additional Information:</i> |                  | <i>Recipient Type:</i> Institution<br><i>Grant / Contract Purpose:</i> Research |
| Epizyme, Inc.,                                                                                                                            | Grant / Contract | Self                                                                            |
| <i>Recipient Name:</i> University of Washington<br><i>Grant / Contract Description:</i> Clinical trial<br><i>Additional Information:</i>  |                  | <i>Recipient Type:</i> Institution<br><i>Grant / Contract Purpose:</i> Research |
| Karyopharm Therapeutics                                                                                                                   | Grant / Contract | Self                                                                            |
| <i>Recipient Name:</i> University of Washington<br><i>Grant / Contract Description:</i> Clinical trials<br><i>Additional Information:</i> |                  | <i>Recipient Type:</i> Institution<br><i>Grant / Contract Purpose:</i> Research |
| SpringWorks                                                                                                                               | Grant / Contract | Self                                                                            |
| <i>Recipient Name:</i> University of Washington<br><i>Grant / Contract Description:</i> Clinical trial<br><i>Additional Information:</i>  |                  | <i>Recipient Type:</i> Institution<br><i>Grant / Contract Purpose:</i> Research |

## Additional Questions

1. Are there other relationships or activities that readers could perceive to have influenced, or that give the appearance of potentially influencing, what you wrote in the submitted work?

Yes.

- a. Please describe those relationships.

Site-PI for the study reported in the manuscript

2. What is the manuscript title?

Nirogacestat: A Gamma Secretase Inhibitor for Desmoid Tumors (DeFi Trial)

3. Are you the corresponding author?

No.

## Certification

I certify that the information provided in this disclosure is complete and accurate.

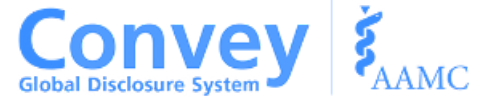

Filomena Mazzeo

**Discloser Identifier:** 1087962

**Disclosure Purpose:** 22-10140

## Summary of Interests

I do not have any interests to disclose at this time.

## Additional Questions

1. **Are there other relationships or activities that readers could perceive to have influenced, or that give the appearance of potentially influencing, what you wrote in the submitted work?**

No.

2. **What is the manuscript title?**

Nirogacestat: A Gamma-Secretase Inhibitor for Desmoid Tumors (DeFi Trial)

3. **Are you the corresponding author?**

No.

## Certification

I certify that the information provided in this disclosure is complete and accurate.

Priscilla Merriam

**Discloser Identifier:** 1087845

**Disclosure Purpose:** 22-10140

## Summary of Interests

I do not have any interests to disclose at this time.

## Additional Questions

1. **Are there other relationships or activities that readers could perceive to have influenced, or that give the appearance of potentially influencing, what you wrote in the submitted work?**

No.

2. **What is the manuscript title?**

Nirogacestat, : A Gamma Secretase Inhibitor for treatment of Desmoid Tumors: a multicenter, randomised versus placebo, phase 3 trial (DeFi Trial)

3. **Are you the corresponding author?**

No.

## Certification

I certify that the information provided in this disclosure is complete and accurate.

Stephanie Moody

**Discloser Identifier:** 1087421

**Disclosure Purpose:** 22-10140

## Summary of Interests

I do not have any interests to disclose at this time.

## Additional Questions

1. **Are there other relationships or activities that readers could perceive to have influenced, or that give the appearance of potentially influencing, what you wrote in the submitted work?**

No.

2. **What is the manuscript title?**

Nirogacestat, a Gamma-Secretase Inhibitor for Desmoid Tumors

3. **Are you the corresponding author?**

No.

## Certification

I certify that the information provided in this disclosure is complete and accurate.

Discloser Identifier: 738632

Disclosure Purpose: 22-10140

## Summary of Interests

### Company or Organization

| Entity                                                                               | Type       | Interest Held By |
|--------------------------------------------------------------------------------------|------------|------------------|
| Daiichi Sankyo Company                                                               | Consultant | Self             |
| <i>Category:</i> Consultant<br><i>Description:</i><br><i>Additional Information:</i> |            |                  |
| Daiichi Sankyo Europe GmbH                                                           | Consultant | Self             |
| <i>Category:</i> Consultant<br><i>Description:</i><br><i>Additional Information:</i> |            |                  |
| Deciphera Pharmaceuticals Inc.                                                       | Consultant | Self             |
| <i>Category:</i> Consultant<br><i>Description:</i><br><i>Additional Information:</i> |            |                  |
| EUSA Pharma (US) LLC                                                                 | Consultant | Self             |
| <i>Category:</i> Consultant<br><i>Description:</i><br><i>Additional Information:</i> |            |                  |
| SynOx Therapeutics                                                                   | Consultant | Self             |
| <i>Category:</i> Consultant<br><i>Description:</i><br><i>Additional Information:</i> |            |                  |

## Additional Questions

1. Are there other relationships or activities that readers could perceive to have influenced, or that give the appearance of potentially influencing, what you wrote in the submitted work?

No.

2. What is the manuscript title?

Nirogacestat: A Gamma Secretase Inhibitor for Desmoid Tumors (DeFi Trial)

3. Are you the corresponding author?

No.

## Certification

I certify that the information provided in this disclosure is complete and accurate.





Tony Philip

Discloser Identifier: 1014454

Disclosure Purpose: 22-10140

## Summary of Interests

### Company or Organization

| Entity                                                                               | Type       | Interest Held By |
|--------------------------------------------------------------------------------------|------------|------------------|
| AstraZeneca                                                                          | Consultant | Self             |
| <i>Category:</i> Consultant<br><i>Description:</i><br><i>Additional Information:</i> |            |                  |
| Bayer HealthCare Pharmaceuticals Inc.                                                | Consultant | Self             |
| <i>Category:</i> Consultant<br><i>Description:</i><br><i>Additional Information:</i> |            |                  |
| Daiichi Sankyo Company                                                               | Consultant | Self             |
| <i>Category:</i> Consultant<br><i>Description:</i><br><i>Additional Information:</i> |            |                  |
| Deciphera Pharmaceuticals Inc.                                                       | Consultant | Self             |
| <i>Category:</i> Consultant<br><i>Description:</i><br><i>Additional Information:</i> |            |                  |

## Additional Questions

1. **Are there other relationships or activities that readers could perceive to have influenced, or that give the appearance of potentially influencing, what you wrote in the submitted work?**

No.

2. **What is the manuscript title?**

Nirogacestat: A Gamma Secretase Inhibitor for Desmoid Tumors (DeFi Trial)

3. **Are you the corresponding author?**

No.

## Certification

I certify that the information provided in this disclosure is complete and accurate.



Joseph Pressey

**Discloser Identifier:** 890250

**Disclosure Purpose:** 22-10140

## Summary of Interests

I do not have any interests to disclose at this time.

## Additional Questions

1. **Are there other relationships or activities that readers could perceive to have influenced, or that give the appearance of potentially influencing, what you wrote in the submitted work?**

No.

2. **What is the manuscript title?**

Nirogacestat: A Gamma-Secretase Inhibitor for Desmoid Tumors (DeFi Trial)

3. **Are you the corresponding author?**

No.

## Certification

I certify that the information provided in this disclosure is complete and accurate.

**Discloser Identifier:** 890248

**Disclosure Purpose:** 22-10140

## Summary of Interests

### Company or Organization

| Entity                                                                                                                                                                                                         | Type       | Interest Held By |
|----------------------------------------------------------------------------------------------------------------------------------------------------------------------------------------------------------------|------------|------------------|
| Ayala Pharmaceuticals                                                                                                                                                                                          | Other      | Self             |
| <i>Category:</i> Other<br><i>Description:</i> Clinical Trial<br><i>Additional Information:</i> Site Principal Investigator. Research funding to institution only.                                              |            |                  |
| Bayer HealthCare Pharmaceuticals Inc.                                                                                                                                                                          | Other      | Self             |
| <i>Category:</i> Other<br><i>Description:</i> Medical Advisory Board<br><i>Additional Information:</i> One time payment                                                                                        |            |                  |
| C4 Therapeutics                                                                                                                                                                                                | Other      | Self             |
| <i>Category:</i> Other<br><i>Description:</i> Research Funding paid to institution only.<br><i>Additional Information:</i>                                                                                     |            |                  |
| Epizyme, Inc.,                                                                                                                                                                                                 | Other      | Self             |
| <i>Category:</i> Other<br><i>Description:</i> Speaking Engagement and Medical Advisory Board<br><i>Additional Information:</i>                                                                                 |            |                  |
| Springworks Therapeutics                                                                                                                                                                                       | Other      | Self             |
| <i>Category:</i> Other<br><i>Description:</i> Clinical Trial<br><i>Additional Information:</i> Site Principle Investigator. Funding paid to institution only. Travel for Investigator Meeting paid by company. |            |                  |
| Springworks Therapeutics                                                                                                                                                                                       | Consultant | Self             |
| <i>Category:</i> Consultant<br><i>Description:</i> Advisory Board<br><i>Additional Information:</i> one time payment                                                                                           |            |                  |

## Additional Questions

1. Are there other relationships or activities that readers could perceive to have influenced, or that give the appearance of potentially influencing, what you wrote in the submitted work?

No.

**2. What is the manuscript title?**

Nirogacestat: A Gamma-Secretase Inhibitor for Desmoid Tumors (DeFi Trial)

**3. Are you the corresponding author?**

No.

## Certification

I certify that the information provided in this disclosure is complete and accurate.

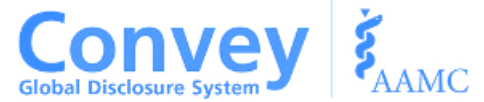

**Discloser Identifier:** 878322

**Disclosure Purpose:** 22-10140

## Summary of Interests

### Company or Organization

| Entity                                                                                      | Type       | Interest Held By |
|---------------------------------------------------------------------------------------------|------------|------------------|
| Blueprint Medicines Corporation                                                             | Consultant | Self             |
| <i>Category:</i> Consultant<br><i>Description:</i><br><i>Additional Information:</i>        |            |                  |
| Boehringer Ingelheim                                                                        | Other      | Self             |
| <i>Category:</i> Other<br><i>Description:</i> Speaker fee<br><i>Additional Information:</i> |            |                  |
| Boehringer Ingelheim                                                                        | Consultant | Self             |
| <i>Category:</i> Consultant<br><i>Description:</i><br><i>Additional Information:</i>        |            |                  |
| Deciphera Pharmaceuticals Inc.                                                              | Consultant | Self             |
| <i>Category:</i> Consultant<br><i>Description:</i><br><i>Additional Information:</i>        |            |                  |
| Deciphera Pharmaceuticals Inc.                                                              | Other      | Self             |
| <i>Category:</i> Other<br><i>Description:</i> Speaker fee<br><i>Additional Information:</i> |            |                  |
| GlaxoSmithKline                                                                             | Consultant | Self             |
| <i>Category:</i> Consultant<br><i>Description:</i><br><i>Additional Information:</i>        |            |                  |
| Novartis                                                                                    | Consultant | Self             |
| <i>Category:</i> Consultant<br><i>Description:</i><br><i>Additional Information:</i>        |            |                  |
| PharmaMar                                                                                   | Consultant | Self             |
| <i>Category:</i> Consultant<br><i>Description:</i><br><i>Additional Information:</i>        |            |                  |

| Entity                                                                                      | Type  | Interest Held By |
|---------------------------------------------------------------------------------------------|-------|------------------|
| PharmaMar                                                                                   | Other | Self             |
| <i>Category:</i> Other<br><i>Description:</i> Speaker fee<br><i>Additional Information:</i> |       |                  |

## Additional Questions

1. **Are there other relationships or activities that readers could perceive to have influenced, or that give the appearance of potentially influencing, what you wrote in the submitted work?**

No.

2. **What is the manuscript title?**

Nirogacestat: A Gamma Secretase Inhibitor for Desmoid Tumors (DeFi Trial)

3. **Are you the corresponding author?**

No.

## Certification

I certify that the information provided in this disclosure is complete and accurate.

Discloser Identifier: 342818

Disclosure Purpose: 22-10140

## Summary of Interests

### Company or Organization

| Entity                                                                                                             | Type             | Interest Held By                                                                |
|--------------------------------------------------------------------------------------------------------------------|------------------|---------------------------------------------------------------------------------|
| AADi                                                                                                               | Grant / Contract | Other - Institution - Clinical Research Support                                 |
| <i>Recipient Name:</i><br><i>Grant / Contract Description:</i><br><i>Additional Information:</i> Clinical Trial PI |                  | <i>Recipient Type:</i> Institution<br><i>Grant / Contract Purpose:</i> Research |
| AADi                                                                                                               | Consultant       | Self                                                                            |
| <i>Category:</i> Consultant<br><i>Description:</i><br><i>Additional Information:</i>                               |                  |                                                                                 |
| AROG                                                                                                               | Grant / Contract | Other - Institution - Clinical Research Support                                 |
| <i>Recipient Name:</i><br><i>Grant / Contract Description:</i><br><i>Additional Information:</i> Clinical Trial PI |                  | <i>Recipient Type:</i> Institution<br><i>Grant / Contract Purpose:</i> Research |
| Ayala                                                                                                              | Grant / Contract | Other - Institution - Clinical Research Support                                 |
| <i>Recipient Name:</i><br><i>Grant / Contract Description:</i><br><i>Additional Information:</i> Clinical Trial PI |                  | <i>Recipient Type:</i> Institution<br><i>Grant / Contract Purpose:</i> Research |
| Bayer                                                                                                              | Consultant       | Self                                                                            |
| <i>Category:</i> Consultant<br><i>Description:</i> Advisory Board<br><i>Additional Information:</i>                |                  |                                                                                 |
| BioAtla                                                                                                            | Grant / Contract | Other - Institution - Clinical Research Support                                 |
| <i>Recipient Name:</i><br><i>Grant / Contract Description:</i><br><i>Additional Information:</i> Clinical Trial PI |                  | <i>Recipient Type:</i> Institution<br><i>Grant / Contract Purpose:</i> Research |
| Blueprint Medicines Corporation                                                                                    | Consultant       | Self                                                                            |
| <i>Category:</i> Consultant<br><i>Description:</i> Advisory Board<br><i>Additional Information:</i>                |                  |                                                                                 |
| Cogent Biosciences                                                                                                 | Grant / Contract | Other - Institution - Clinical Research Support                                 |
| <i>Recipient Name:</i><br><i>Grant / Contract Description:</i><br><i>Additional Information:</i> Clinical Trial PI |                  | <i>Recipient Type:</i> Institution<br><i>Grant / Contract Purpose:</i> Research |



| Entity                                                                                                             | Type             | Interest Held By                                                                |
|--------------------------------------------------------------------------------------------------------------------|------------------|---------------------------------------------------------------------------------|
| Daiichi Sankyo Company                                                                                             | Grant / Contract | Other - Institution - Clinical Research Support                                 |
| <b>Recipient Name:</b><br><b>Grant / Contract Description:</b><br><b>Additional Information:</b> Clinical Trial PI |                  | <b>Recipient Type:</b> Institution<br><b>Grant / Contract Purpose:</b> Research |
| Deciphera Pharmaceuticals Inc.                                                                                     | Grant / Contract | Other - Institution - Clinical Research Support                                 |
| <b>Recipient Name:</b><br><b>Grant / Contract Description:</b><br><b>Additional Information:</b> Clinical Trial PI |                  | <b>Recipient Type:</b> Institution<br><b>Grant / Contract Purpose:</b> Research |
| GlaxoSmithKline                                                                                                    | Grant / Contract | Other - Institution - Clinical Research Support                                 |
| <b>Recipient Name:</b><br><b>Grant / Contract Description:</b><br><b>Additional Information:</b> Clinical Trial PI |                  | <b>Recipient Type:</b> Institution<br><b>Grant / Contract Purpose:</b> Research |
| Inhibrx                                                                                                            | Grant / Contract | Other - Institution - Clinical Research Support                                 |
| <b>Recipient Name:</b><br><b>Grant / Contract Description:</b><br><b>Additional Information:</b> Clinical Trial PI |                  | <b>Recipient Type:</b> Institution<br><b>Grant / Contract Purpose:</b> Research |
| Karyopharm Therapeutics                                                                                            | Grant / Contract | Other - Institution - Clinical Research Support                                 |
| <b>Recipient Name:</b><br><b>Grant / Contract Description:</b><br><b>Additional Information:</b> Clinical Trial PI |                  | <b>Recipient Type:</b> Institution<br><b>Grant / Contract Purpose:</b> Research |
| NanoCarrier                                                                                                        | Grant / Contract | Other - Institution - Clinical Research Support                                 |
| <b>Recipient Name:</b><br><b>Grant / Contract Description:</b><br><b>Additional Information:</b> Clinical Trial PI |                  | <b>Recipient Type:</b> Institution<br><b>Grant / Contract Purpose:</b> Research |
| NanoCarrier                                                                                                        | Consultant       | Self                                                                            |
| <b>Category:</b> Consultant<br><b>Description:</b><br><b>Additional Information:</b>                               |                  |                                                                                 |
| Oncternal                                                                                                          | Grant / Contract | Other - Institution - Clinical Research Support                                 |
| <b>Recipient Name:</b><br><b>Grant / Contract Description:</b><br><b>Additional Information:</b> Clinical Trial PI |                  | <b>Recipient Type:</b> Institution<br><b>Grant / Contract Purpose:</b> Research |
| Plexxikon Inc.                                                                                                     | Grant / Contract | Other - Institution - Clinical Research Support                                 |
| <b>Recipient Name:</b><br><b>Grant / Contract Description:</b><br><b>Additional Information:</b> Clinical Trial PI |                  | <b>Recipient Type:</b> Institution<br><b>Grant / Contract Purpose:</b> Research |
| SpringWorks Therapeutics                                                                                           | Grant / Contract | Other - Institution - Clinical Research Support                                 |
| <b>Recipient Name:</b><br><b>Grant / Contract Description:</b><br><b>Additional Information:</b>                   |                  | <b>Recipient Type:</b><br><b>Grant / Contract Purpose:</b>                      |
| SpringWorks Therapeutics                                                                                           | Consultant       | Self                                                                            |

| Entity                                                                                                             | Type             | Interest Held By                                |
|--------------------------------------------------------------------------------------------------------------------|------------------|-------------------------------------------------|
| <i>Category:</i> Consultant<br><i>Description:</i><br><i>Additional Information:</i>                               |                  |                                                 |
| Tracon                                                                                                             | Grant / Contract | Other - Institution - Clinical Research Support |
| <i>Recipient Name:</i><br><i>Grant / Contract Description:</i><br><i>Additional Information:</i> Clinical Trial PI |                  |                                                 |
| <i>Recipient Type:</i> Institution<br><i>Grant / Contract Purpose:</i> Research                                    |                  |                                                 |
| Trillium                                                                                                           | Grant / Contract | Other - Institution - Clinical Research Support |
| <i>Recipient Name:</i><br><i>Grant / Contract Description:</i><br><i>Additional Information:</i> Clinical Trial PI |                  |                                                 |
| <i>Recipient Type:</i> Institution<br><i>Grant / Contract Purpose:</i> Research                                    |                  |                                                 |

## Additional Questions

1. **Are there other relationships or activities that readers could perceive to have influenced, or that give the appearance of potentially influencing, what you wrote in the submitted work?**

No.

2. **What is the manuscript title?**

Nirogacestat: A Gamma Secretase Inhibitor for Desmoid Tumors (DeFi Trial)

3. **Are you the corresponding author?**

No.

## Certification

I certify that the information provided in this disclosure is complete and accurate.

**Discloser Identifier:** 538314

**Disclosure Purpose:** 22-10140

## Summary of Interests

### Company or Organization

| Entity                                                          | Type       | Interest Held By |
|-----------------------------------------------------------------|------------|------------------|
| Blueprint Medicines Corporation                                 | Consultant | Self             |
| Category: Consultant<br>Description:<br>Additional Information: |            |                  |
| Boehringer Ingelheim                                            | Consultant | Self             |
| Category: Consultant<br>Description:<br>Additional Information: |            |                  |
| Deciphera Pharmaceuticals Inc.                                  | Consultant | Self             |
| Category: Consultant<br>Description:<br>Additional Information: |            |                  |
| Eisai                                                           | Consultant | Self             |
| Category: Consultant<br>Description:<br>Additional Information: |            |                  |
| Exelixis Inc.                                                   | Consultant | Self             |
| Category: Consultant<br>Description:<br>Additional Information: |            |                  |
| Medpace                                                         | Consultant | Self             |
| Category: Consultant<br>Description:<br>Additional Information: |            |                  |
| Merck                                                           | Consultant | Self             |
| Category: Consultant<br>Description:<br>Additional Information: |            |                  |
| Servier Pharmaceuticals LLC                                     | Consultant | Self             |
| Category: Consultant<br>Description:<br>Additional Information: |            |                  |

## Additional Questions

1. **Are there other relationships or activities that readers could perceive to have influenced, or that give the appearance of potentially influencing, what you wrote in the submitted work?**

No.

2. **What is the manuscript title?**

Nirogacestat: A Gamma Secretase Inhibitor for Desmoid Tumors (DeFi Trial)

3. **Are you the corresponding author?**

No.

## Certification

I certify that the information provided in this disclosure is complete and accurate.

Discloser Identifier: 1087965

Disclosure Purpose: 22-10140

## Summary of Interests

### Company or Organization

| Entity                                                                             | Type              | Interest Held By                                              |
|------------------------------------------------------------------------------------|-------------------|---------------------------------------------------------------|
| SpringWorks Therapeutics, Inc                                                      | Employment        | Self                                                          |
| <i>Title:</i> Chief Development Officer<br><i>Additional Information:</i>          |                   | <i>Position Description:</i> Product Development              |
| SpringWorks Therapeutics, Inc                                                      | Fiduciary Officer | Self                                                          |
| <i>Official Title:</i> Chief Development Officer<br><i>Additional Information:</i> |                   | <i>Position Description:</i> Responsible for drug development |
| SpringWorks Therapeutics, Inc                                                      | Stock             | Self                                                          |
| <i>Additional Information:</i>                                                     |                   |                                                               |
| SpringWorks Therapeutics, Inc                                                      | Stock Option      | Self                                                          |
| <i>Additional Information:</i>                                                     |                   |                                                               |

## Additional Questions

1. **Are there other relationships or activities that readers could perceive to have influenced, or that give the appearance of potentially influencing, what you wrote in the submitted work?**

No.

2. **What is the manuscript title?**

Nirogacestat: A Gamma-Secretase Inhibitor for Desmoid Tumors (DeFi Trial)

3. **Are you the corresponding author?**

No.

## Certification

I certify that the information provided in this disclosure is complete and accurate.



**Discloser Identifier:** 738634

**Disclosure Purpose:** 22-10140

## Summary of Interests

### Company or Organization

| Entity                                                                                                                     | Type       | Interest Held By |
|----------------------------------------------------------------------------------------------------------------------------|------------|------------------|
| Aadi                                                                                                                       | Other      | Self             |
| <i>Category:</i> Other<br><i>Description:</i> Honoraria for participation to a symposium<br><i>Additional Information:</i> |            |                  |
| Astex Pharmaceuticals                                                                                                      | Consultant | Self             |
| <i>Category:</i> Consultant<br><i>Description:</i><br><i>Additional Information:</i>                                       |            |                  |
| Bavarian Nordic A/S                                                                                                        | Consultant | Self             |
| <i>Category:</i> Consultant<br><i>Description:</i><br><i>Additional Information:</i>                                       |            |                  |
| Bayer                                                                                                                      | Consultant | Self             |
| <i>Category:</i> Consultant<br><i>Description:</i><br><i>Additional Information:</i>                                       |            |                  |
| Boehringer Ingelheim                                                                                                       | Consultant | Self             |
| <i>Category:</i> Consultant<br><i>Description:</i><br><i>Additional Information:</i>                                       |            |                  |
| Daiichi Sankyo Company                                                                                                     | Consultant | Self             |
| <i>Category:</i> Consultant<br><i>Description:</i><br><i>Additional Information:</i>                                       |            |                  |
| Gentili                                                                                                                    | Consultant | Self             |
| <i>Category:</i> Consultant<br><i>Description:</i><br><i>Additional Information:</i>                                       |            |                  |
| GlaxoSmithKline                                                                                                            | Consultant | Self             |
| <i>Category:</i> Consultant<br><i>Description:</i><br><i>Additional Information:</i>                                       |            |                  |

| Entity                                                                                                                                                                         | Type       | Interest Held By |
|--------------------------------------------------------------------------------------------------------------------------------------------------------------------------------|------------|------------------|
| Ikena                                                                                                                                                                          | Consultant | Self             |
| <i>Category:</i> Consultant<br><i>Description:</i><br><i>Additional Information:</i>                                                                                           |            |                  |
| Maxivax                                                                                                                                                                        | Consultant | Self             |
| <i>Category:</i> Consultant<br><i>Description:</i><br><i>Additional Information:</i>                                                                                           |            |                  |
| Novartis                                                                                                                                                                       | Consultant | Self             |
| <i>Category:</i> Consultant<br><i>Description:</i><br><i>Additional Information:</i>                                                                                           |            |                  |
| pharmamar                                                                                                                                                                      | Consultant | Self             |
| <i>Category:</i> Consultant<br><i>Description:</i><br><i>Additional Information:</i>                                                                                           |            |                  |
| RainTherapeutic                                                                                                                                                                | Consultant | Self             |
| <i>Category:</i> Consultant<br><i>Description:</i><br><i>Additional Information:</i>                                                                                           |            |                  |
| Servier Pharmaceuticals LLC                                                                                                                                                    | Consultant | Self             |
| <i>Category:</i> Consultant<br><i>Description:</i><br><i>Additional Information:</i>                                                                                           |            |                  |
| Springworks                                                                                                                                                                    | Other      | Self             |
| <i>Category:</i> Other<br><i>Description:</i> research funding to my Institution for clinical study in which I am the Principal Investigator<br><i>Additional Information:</i> |            |                  |

## Additional Questions

1. **Are there other relationships or activities that readers could perceive to have influenced, or that give the appearance of potentially influencing, what you wrote in the submitted work?**

No.

2. **What is the manuscript title?**

Nirogacestat: A Gamma Secretase Inhibitor for Desmoid Tumors (DeFi Trial)

3. **Are you the corresponding author?**

No.



## Certification

I certify that the information provided in this disclosure is complete and accurate.



**Discloser Identifier:** 1087958

**Disclosure Purpose:** 22-10140

## Summary of Interests

I do not have any interests to disclose at this time.

## Additional Questions

1. **Are there other relationships or activities that readers could perceive to have influenced, or that give the appearance of potentially influencing, what you wrote in the submitted work?**

No.

2. **What is the manuscript title?**

Nirogacestat, : A Gamma Secretase Inhibitor for treatment of Desmoid Tumors: a multicenter, randomised versus placebo, phase 3 trial (DeFi Trial)

3. **Are you the corresponding author?**

No.

## Certification

I certify that the information provided in this disclosure is complete and accurate.

**Discloser Identifier:** 992175

**Disclosure Purpose:** 22-10140

## Summary of Interests

### Company or Organization

| Entity                                                                                                    | Type  | Interest Held By  |
|-----------------------------------------------------------------------------------------------------------|-------|-------------------|
| Springworks                                                                                               | Other | Other - Institute |
| <i>Category:</i> Other<br><i>Description:</i> advisory board<br><i>Additional Information:</i> incidental |       |                   |

## Additional Questions

1. **Are there other relationships or activities that readers could perceive to have influenced, or that give the appearance of potentially influencing, what you wrote in the submitted work?**

No.

2. **What is the manuscript title?**

Nirogacestat, a gamma secretase inhibitor for desmoid tumors (DeFi trial)

3. **Are you the corresponding author?**

No.

## Certification

I certify that the information provided in this disclosure is complete and accurate.

Discloser Identifier: 808773

Disclosure Purpose: 22-10140

## Summary of Interests

### Company or Organization

| Entity                                                                                                                                                                                                                                                                                                                                                                                                                                                                                                                                                      | Type       | Interest Held By |
|-------------------------------------------------------------------------------------------------------------------------------------------------------------------------------------------------------------------------------------------------------------------------------------------------------------------------------------------------------------------------------------------------------------------------------------------------------------------------------------------------------------------------------------------------------------|------------|------------------|
| ADRx                                                                                                                                                                                                                                                                                                                                                                                                                                                                                                                                                        | Consultant | Self             |
| <p><i>Category:</i> Consultant<br/> <i>Description:</i> ADRx working on a cancer project and they are requesting my expertise. (2021)<br/> <i>Additional Information:</i></p>                                                                                                                                                                                                                                                                                                                                                                               |            |                  |
| Apexigen Inc                                                                                                                                                                                                                                                                                                                                                                                                                                                                                                                                                | Consultant | Self             |
| <p><i>Category:</i> Consultant<br/> <i>Description:</i> Attended a virtual Advisory Board Meeting in 2020<br/> <i>Additional Information:</i> contract ended</p>                                                                                                                                                                                                                                                                                                                                                                                            |            |                  |
| Ayala Pharmaceuticals                                                                                                                                                                                                                                                                                                                                                                                                                                                                                                                                       | Consultant | Self             |
| <p><i>Category:</i> Consultant<br/> <i>Description:</i> 60 minute interview + answering follow up questions.<br/> <i>Additional Information:</i> 60 minute interview + answering follow up questions. Ayala Pharmaceuticals is a clinical stage biopharma company developing targeted therapies for rare and aggressive cancers. We are evaluating a new investigational drug for treatment of TGCT. We wish to talk to an expert in the disease and the current treatment options to better understand the unmet needs for another drug on the market.</p> |            |                  |
| Bayer                                                                                                                                                                                                                                                                                                                                                                                                                                                                                                                                                       | Consultant | Self             |
| <p><i>Category:</i> Consultant<br/> <i>Description:</i> Bayer Virtual Medical Advisory Board on November 30, 2021<br/> <i>Additional Information:</i></p>                                                                                                                                                                                                                                                                                                                                                                                                   |            |                  |
| Boehringer Ingelheim                                                                                                                                                                                                                                                                                                                                                                                                                                                                                                                                        | Consultant | Self             |
| <p><i>Category:</i> Consultant<br/> <i>Description:</i> Contract to attend Soft Tissue Sarcoma Consultancy Advisory Board series from 2022-2024<br/> <i>Additional Information:</i></p>                                                                                                                                                                                                                                                                                                                                                                     |            |                  |
| Cytokinetics Inc                                                                                                                                                                                                                                                                                                                                                                                                                                                                                                                                            | Consultant | Self             |
| <p><i>Category:</i> Consultant<br/> <i>Description:</i> Advisor shall provide consulting services in the specialized field of medical oncology as requested<br/> <i>Additional Information:</i> Advisor shall provide consulting services in the specialized field of medical oncology as requested by Cytokinetics. In this role, the Advisor shall attend and participate in Scientific Advisory Board meeting(s) with Cytokinetics' scientists or management or as otherwise designated by Cytokinetics.</p>                                             |            |                  |
| Daiichi Sankyo Company                                                                                                                                                                                                                                                                                                                                                                                                                                                                                                                                      | Consultant | Self             |

| Entity                                                                                                                                                                                                                                                       | Type             | Interest Held By |
|--------------------------------------------------------------------------------------------------------------------------------------------------------------------------------------------------------------------------------------------------------------|------------------|------------------|
| <p><b>Category:</b> Consultant<br/> <b>Description:</b> 2 contracts: 1 for TGCT Advisory Board Meeting 1/25/2021 2nd for Provide expertise<br/> <b>Additional Information:</b> The contract expires on 3/31, 2023</p>                                        |                  |                  |
| Deciphera Pharmaceuticals, Inc                                                                                                                                                                                                                               | Consultant       | Self             |
| <p><b>Category:</b> Consultant<br/> <b>Description:</b> Attended Deciphera's GIST Expert Advisory Board<br/> <b>Additional Information:</b></p>                                                                                                              |                  |                  |
| Epizyme, Inc.,                                                                                                                                                                                                                                               | Consultant       | Self             |
| <p><b>Category:</b> Consultant<br/> <b>Description:</b> Attended a virtual Advisory board on epitheloid sarcoma.<br/> <b>Additional Information:</b></p>                                                                                                     |                  |                  |
| Epizyme, Inc.,                                                                                                                                                                                                                                               | Travel           | Self             |
| <p><b>Location(s):</b> Travel to New York to attend TAZVERIK® (tazemetostat) Epitheloid Sarcoma Advisory Board Meeting<br/> <b>Purpose:</b> Travel to attend Ad Board Meeting<br/> <b>Additional Information:</b></p>                                        |                  |                  |
| GlaxoSmithKline                                                                                                                                                                                                                                              | Grant / Contract | Self             |
| <p><b>Recipient Name:</b> Brian Van Tine<br/> <b>Grant / Contract Description:</b> Research Grant<br/> <b>Additional Information:</b></p> <p style="text-align: right;"><b>Recipient Type:</b> Individual<br/> <b>Grant / Contract Purpose:</b> Research</p> |                  |                  |
| Merck                                                                                                                                                                                                                                                        | Grant / Contract | Self             |
| <p><b>Recipient Name:</b> Brian Van Tine<br/> <b>Grant / Contract Description:</b> Research Grant<br/> <b>Additional Information:</b></p> <p style="text-align: right;"><b>Recipient Type:</b> Individual<br/> <b>Grant / Contract Purpose:</b> Research</p> |                  |                  |
| Pfizer                                                                                                                                                                                                                                                       | Grant / Contract | Self             |
| <p><b>Recipient Name:</b> Brian Van Tine<br/> <b>Grant / Contract Description:</b> Research Grant<br/> <b>Additional Information:</b></p> <p style="text-align: right;"><b>Recipient Type:</b> Individual<br/> <b>Grant / Contract Purpose:</b> Research</p> |                  |                  |
| Polaris Pharmaceuticals                                                                                                                                                                                                                                      | Other            | Self             |
| <p><b>Category:</b> Other<br/> <b>Description:</b> Board Member<br/> <b>Additional Information:</b></p>                                                                                                                                                      |                  |                  |
| PTC Therapeutics                                                                                                                                                                                                                                             | Consultant       | Self             |
| <p><b>Category:</b> Consultant<br/> <b>Description:</b> 2022 Leiomyosarcoma Ad Board Meeting at ASCO<br/> <b>Additional Information:</b></p>                                                                                                                 |                  |                  |
| Tracon Pharmaceuticals                                                                                                                                                                                                                                       | Grant / Contract | Self             |
| <p><b>Recipient Name:</b> Brian Van Tine<br/> <b>Grant / Contract Description:</b> Research Grant<br/> <b>Additional Information:</b></p> <p style="text-align: right;"><b>Recipient Type:</b> Individual<br/> <b>Grant / Contract Purpose:</b> Research</p> |                  |                  |

## Additional Questions

1. **Are there other relationships or activities that readers could perceive to have influenced, or that give the appearance of potentially influencing, what you wrote in the submitted work?**

No.

2. **What is the manuscript title?**

“Nirogacestat: A Gamma-Secretase Inhibitor for Desmoid Tumors (DeFi Trial)”.

3. **Are you the corresponding author?**

No.

## Certification

I certify that the information provided in this disclosure is complete and accurate.

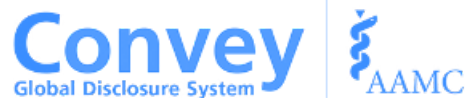

Bruno Vincenzi

**Discloser Identifier:** 408567

**Disclosure Purpose:** 22-10140

## Summary of Interests

I do not have any interests to disclose at this time.

## Additional Questions

1. **Are there other relationships or activities that readers could perceive to have influenced, or that give the appearance of potentially influencing, what you wrote in the submitted work?**

No.

2. **What is the manuscript title?**

Nirogacestat, a Novel Gamma Secretase Inhibitor for Desmoid Tumors

3. **Are you the corresponding author?**

No.

## Certification

I certify that the information provided in this disclosure is complete and accurate.

Discloser Identifier: 1087844

Disclosure Purpose: 22-10140

## Summary of Interests

### Company or Organization

| Entity                                                                                                                                         | Type       | Interest Held By |
|------------------------------------------------------------------------------------------------------------------------------------------------|------------|------------------|
| Adaptimmune                                                                                                                                    | Consultant | Self             |
| Category: Consultant<br>Description:<br>Additional Information:                                                                                |            |                  |
| Adcendo                                                                                                                                        | Consultant | Self             |
| Category: Consultant<br>Description:<br>Additional Information:                                                                                |            |                  |
| Boehringer Ingelheim                                                                                                                           | Consultant | Self             |
| Category: Consultant<br>Description:<br>Additional Information:                                                                                |            |                  |
| Daiichi Sankyo Company                                                                                                                         | Consultant | Self             |
| Category: Consultant<br>Description:<br>Additional Information:                                                                                |            |                  |
| Deciphera Pharmaceuticals Inc.                                                                                                                 | Consultant | Self             |
| Category: Consultant<br>Description:<br>Additional Information:                                                                                |            |                  |
| Epizyme, Inc.,                                                                                                                                 | Consultant | Self             |
| Category: Consultant<br>Description:<br>Additional Information:                                                                                |            |                  |
| Polaris                                                                                                                                        | Consultant | Self             |
| Category: Consultant<br>Description:<br>Additional Information:                                                                                |            |                  |
| Springworks                                                                                                                                    | Consultant | Self             |
| Category: Consultant<br>Description: Provide expertise regarding diagnosis and clinical treatment of desmoid tumors<br>Additional Information: |            |                  |



## Additional Questions

1. **Are there other relationships or activities that readers could perceive to have influenced, or that give the appearance of potentially influencing, what you wrote in the submitted work?**

No.

2. **What is the manuscript title?**

Nirogacestat: A Gamma Secretase Inhibitor for treatment of Desmoid Tumors: a multicenter, randomised versus placebo, phase 3 trial (DeFi Trial)

3. **Are you the corresponding author?**

No.

## Certification

I certify that the information provided in this disclosure is complete and accurate.
